# Supplementary material for: LSD1 defines the fiber type-selective responsiveness to environmental stress in skeletal muscle
Source: eLife journal article supplement (doi:10.7554/elife.84618), 2023-01-13

Fig. 3E

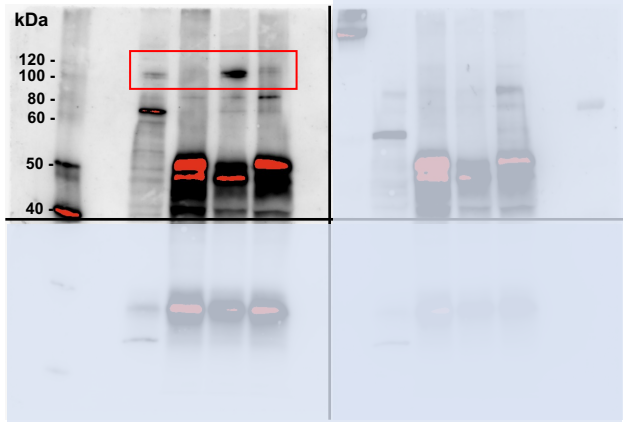

Fig. 5D

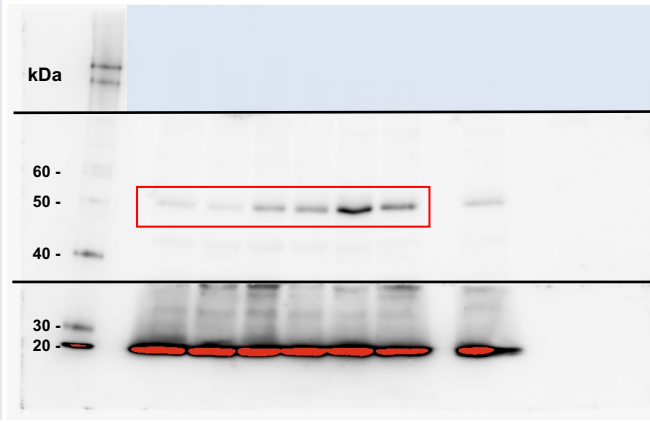

Fig. 6C

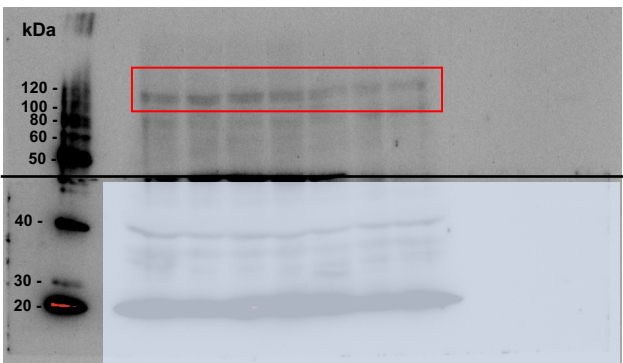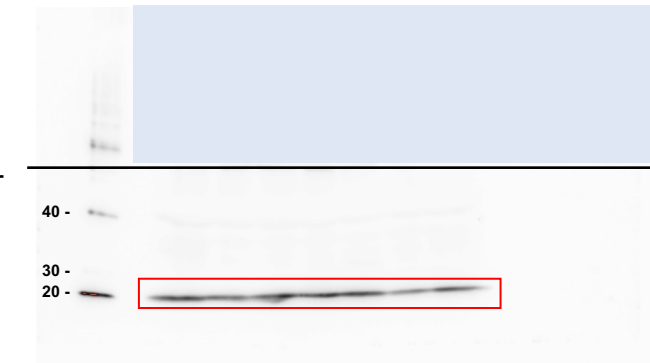

Figure 1-figure supplement 1C

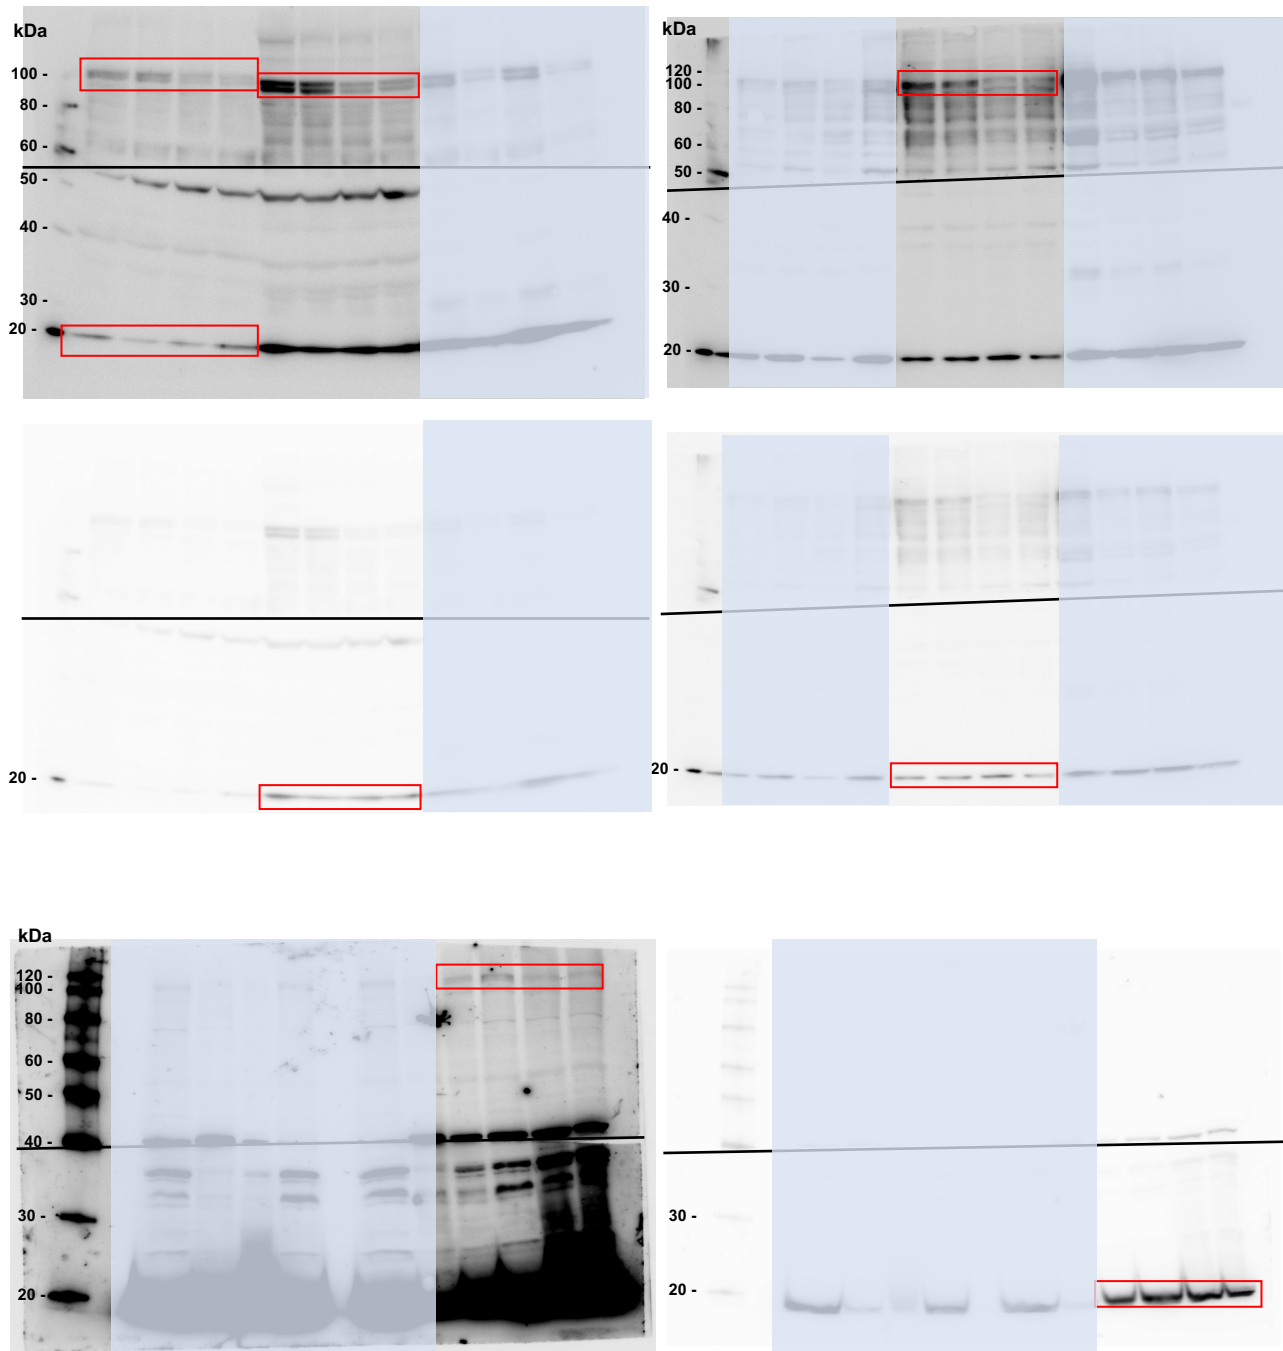

Full uncropped blots

Figure 1-figure supplement 5A

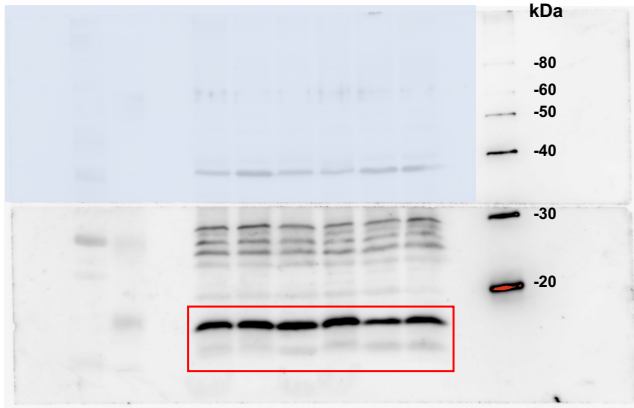

Figure 1-figure supplement 5B

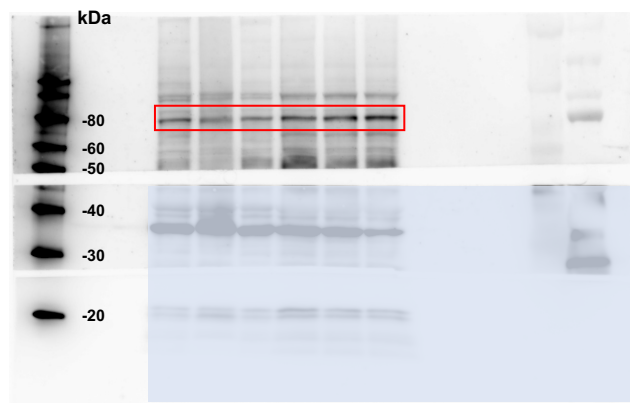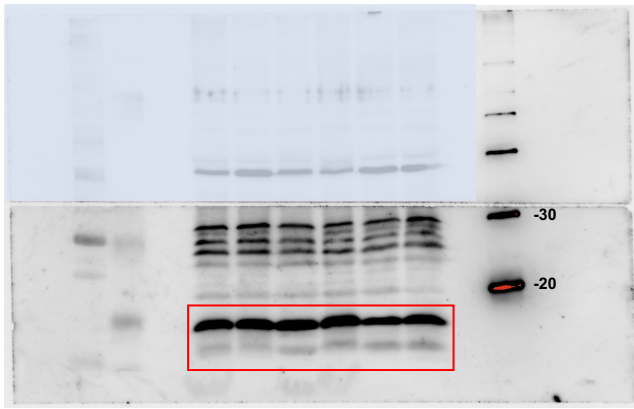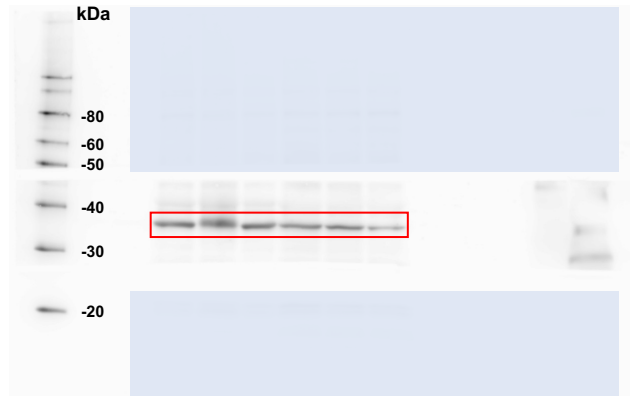

Figure 1-figure supplement 5C

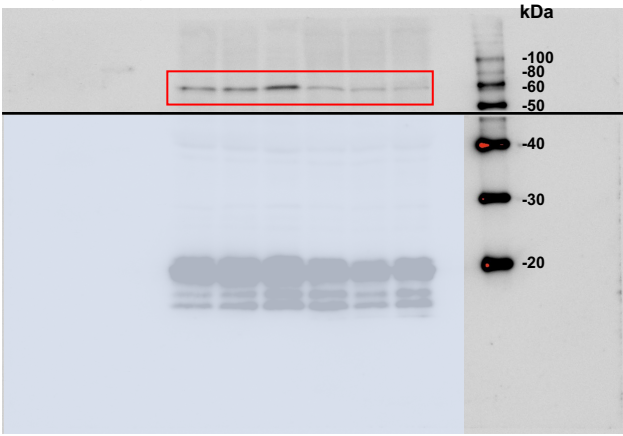

Figure 1-figure supplement 5D

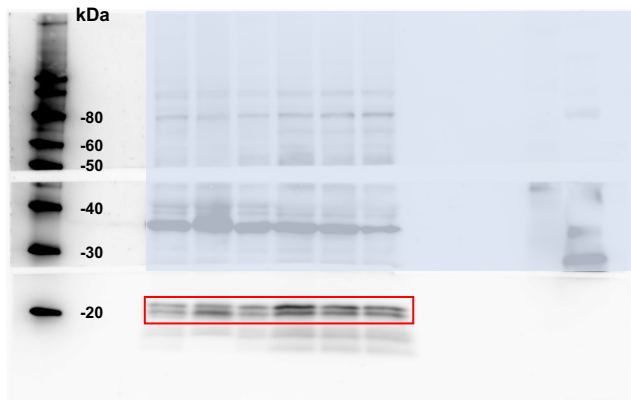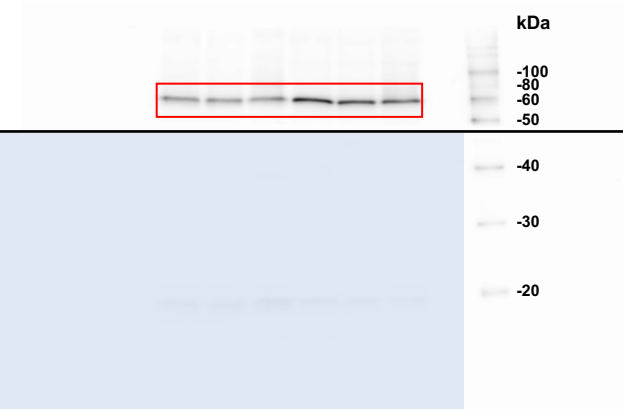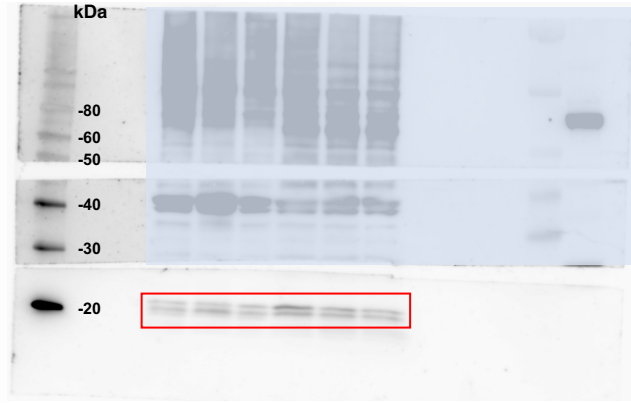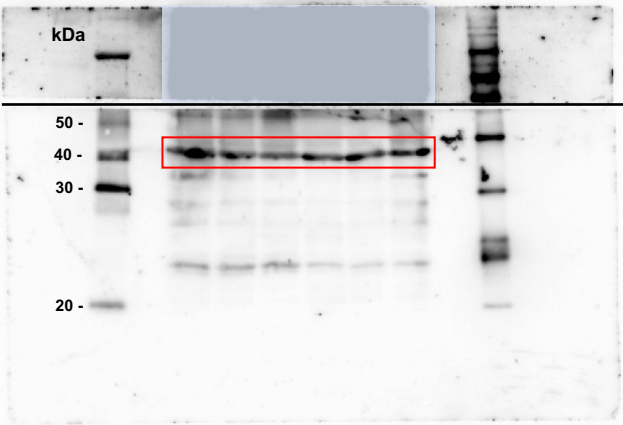

Figure 3-figure supplement 1B

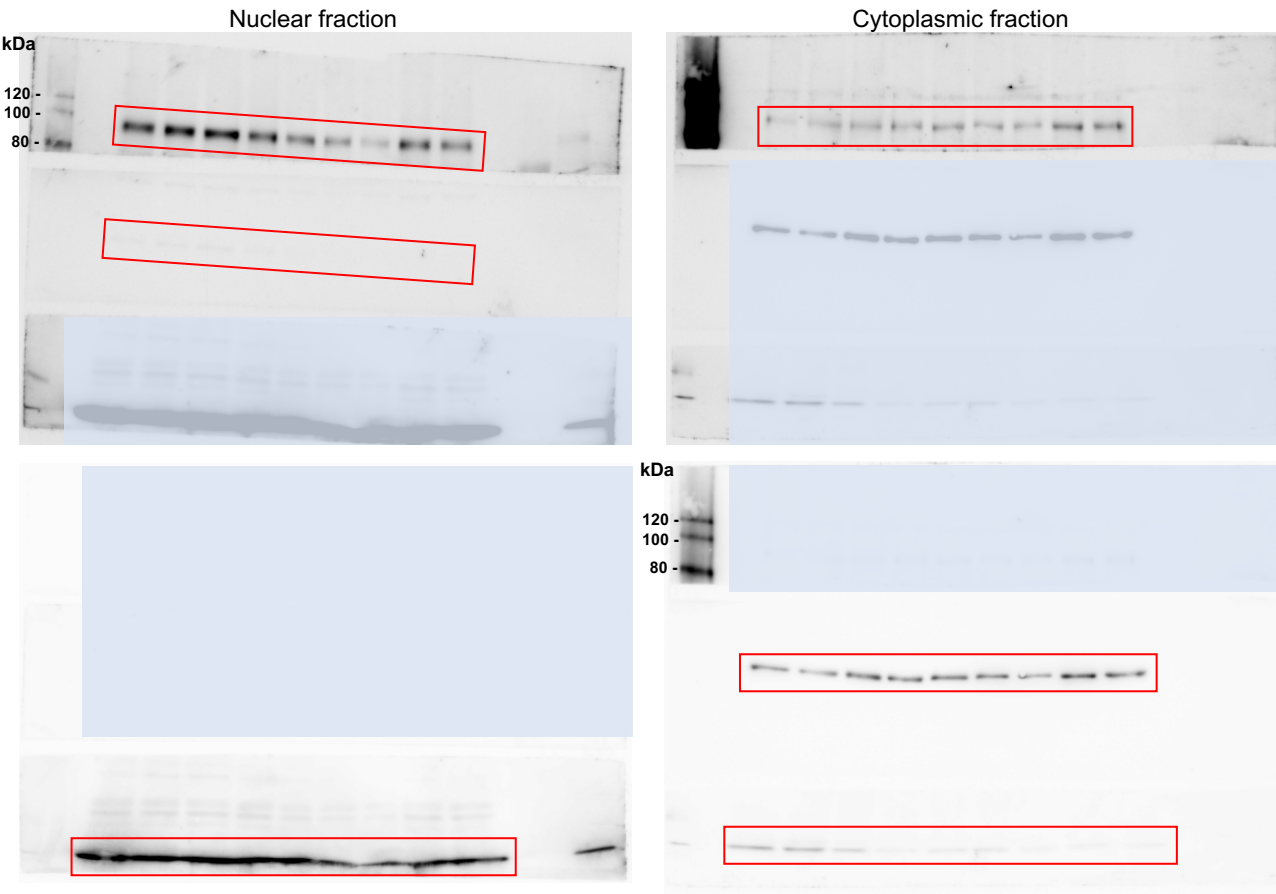

Figure 3-figure supplement 1C

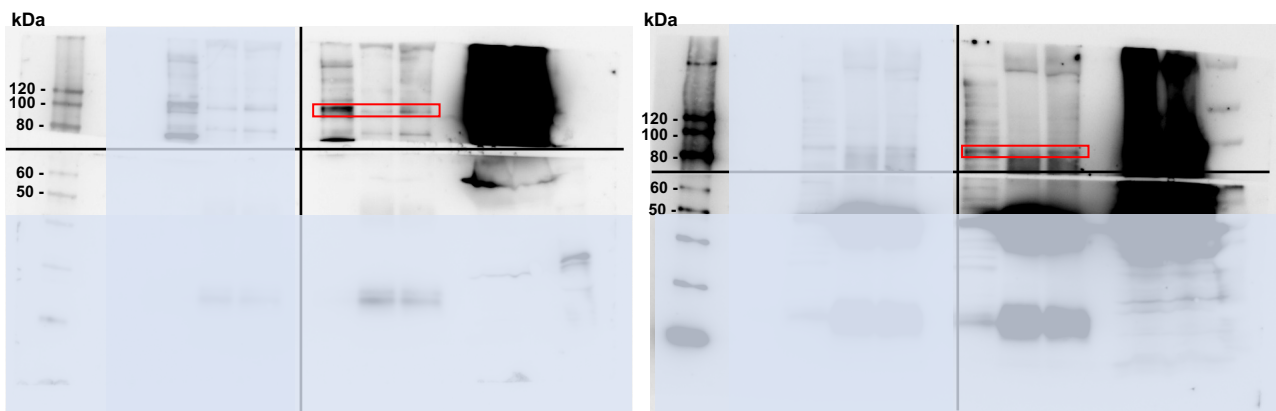

Full uncropped blots

Figure 3-figure supplement 2A

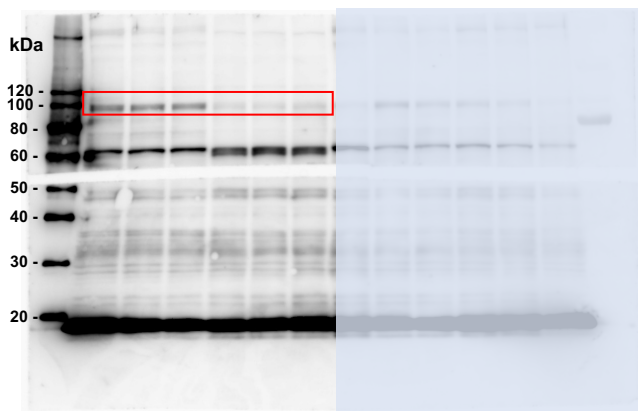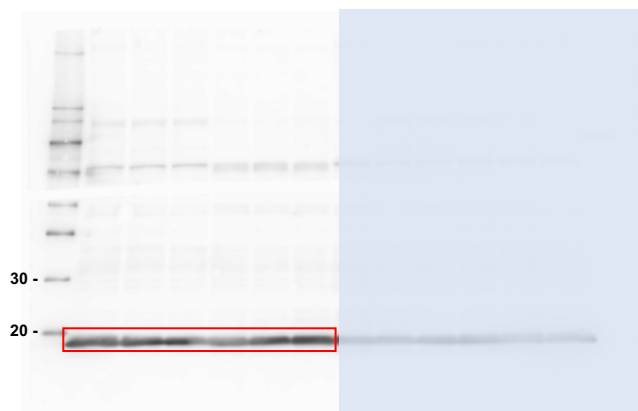

Figure 3-figure supplement 2D

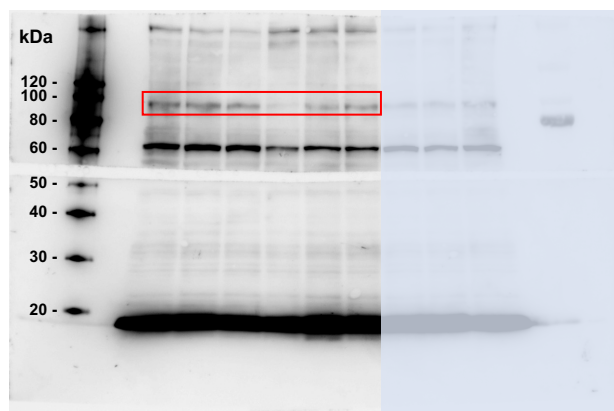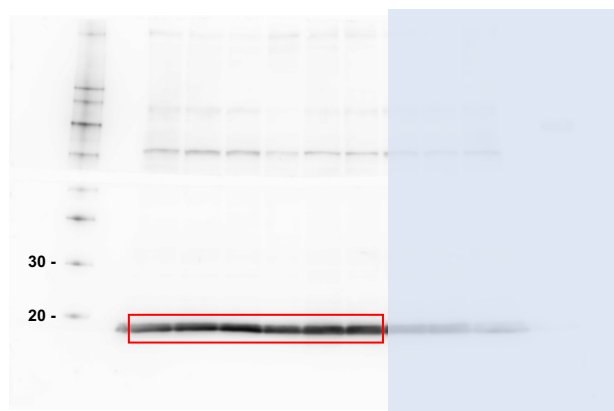

Figure 5-figure supplement 1D

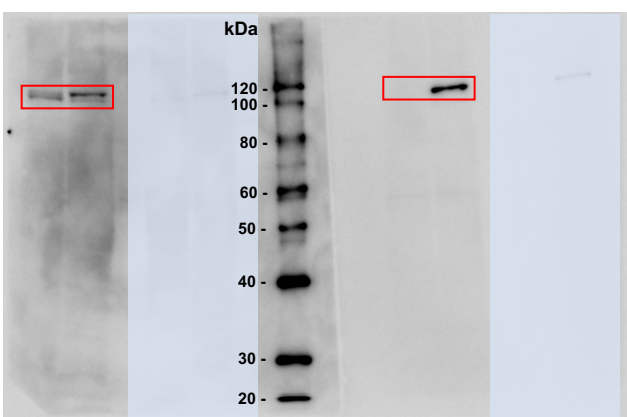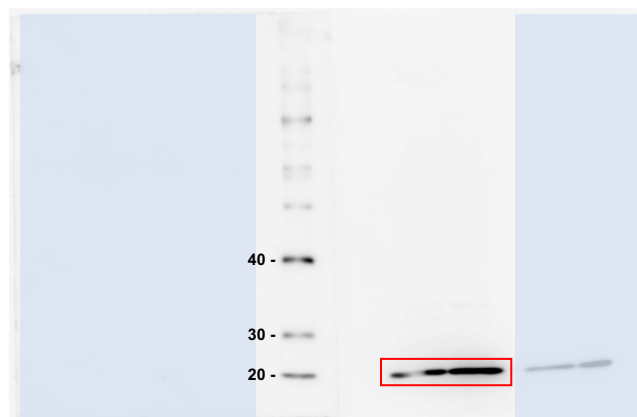

Supplement: supp5 [file elife-84618-supp5-v1.pdf]
