# Supplementary material for: LSD1 defines the fiber type-selective responsiveness to environmental stress in skeletal muscle
Source: eLife. 2023 Jan 25;12:e84618. doi: 10.7554/eLife.84618 (PMC9876571; doi:10.7554/eLife.84618)
Supplement: Figure 2—figure supplement 2—source data 1. [file elife-84618-fig2-figsupp2-data1.xlsx]

## Sheet: up-regulated genes
Up-regulated genes in Figure 2-figure supplement 2A
gene symbol	logFC	logCPM	PValue	FDR		logFC	log2 fold change
						logCPM	log2 counts per million
Des	-0.688374	13.2177	0.000268563	0.0202158
Hspb7	-1.18784	12.2319	7.71624e-08	2.89905e-05
Cryab	-0.894409	12.1115	0.00014772	0.0129957
H19	-1.03729	11.7866	3.20437e-05	0.00409706
Csrp3	-1.15711	10.7475	2.84083e-05	0.00377043
Mybpc2	-1.76889	9.7431	1.06512e-08	5.94518e-06
Casq2	-1.11523	9.26011	9.19315e-09	5.47575e-06
Hspb1	-1.45556	9.08497	6.36287e-06	0.0012431
Myom3	-0.896883	8.90572	0.000312775	0.0225443
Klhl40	-1.58511	8.73051	1.14858e-05	0.00197532
Wfs1	-0.850471	8.68583	5.99578e-05	0.00665558
Kremen1	-0.801538	8.57769	0.000746315	0.0418931
Myh4	-2.62948	8.3833	5.10815e-05	0.00591214
Col3a1	-1.56204	8.2686	0.000444819	0.0288907
Myl6b	-1.81639	8.15211	2.58082e-12	5.72965e-09
Esr1	-5.31199	8.14197	9.26736e-83	2.26318e-78
Adprhl1	-0.634927	8.12836	0.000850366	0.0457418
Tspan3	-0.661686	8.09514	0.000324685	0.0229166
Trim35	-1.06657	8.04362	1.09592e-06	0.000297371
Camk2b	-0.859036	7.99265	1.27556e-06	0.000338591
Actr1b	-0.718699	7.98264	0.00028884	0.0212463
Tgm2	-0.733541	7.88314	0.000680683	0.0395785
Postn	-2.49985	7.72352	1.2787e-09	1.11525e-06
Cand2	-0.900636	7.6898	4.65527e-05	0.00546569
Itga7	-1.07259	7.66118	6.08921e-08	2.43778e-05
Kars	-0.744119	7.65182	4.52357e-05	0.00536907
Bgn	-1.12549	7.62694	7.92146e-05	0.00826709
Capn2	-0.846348	7.50529	4.44869e-05	0.00535179
Padi2	-1.35041	7.48891	2.61733e-06	0.000591832
Ehd4	-1.4917	7.44808	1.30136e-05	0.00217675
Cacnb1	-0.656118	7.42591	0.000400314	0.0269929
Adamtsl5	-0.798244	7.42354	0.000295689	0.0214911
Atp9a	-1.26731	7.36656	1.29216e-08	6.57411e-06
Setd7	-0.844735	7.3498	0.000470061	0.0300507
Mvp	-0.826336	7.24095	5.84981e-05	0.00655313
Cd24a	-1.04006	7.20044	3.76622e-07	0.000114968
Cltb	-0.703411	7.19198	0.000940603	0.0493988
Cacng1	-1.10179	7.12	5.83713e-05	0.00655313
Tmod1	-1.09208	7.11795	5.92086e-08	2.43778e-05
Nes	-1.63919	7.10761	6.11445e-06	0.0012042
Rnf123	-0.815755	7.10518	5.43373e-06	0.00111366
Ttc3	-0.674809	7.09017	0.000416553	0.0275681
Cilp	-1.51755	7.05374	2.91539e-05	0.00384847
Hcfc1r1	-0.801757	7.01724	2.6813e-05	0.00361769
Dusp3	-1.11633	6.9747	4.852e-09	3.38545e-06
Rab15	-1.93603	6.95263	1.03836e-09	9.75298e-07
Itm2a	-0.851837	6.93521	3.96812e-05	0.0047973
Myh3	-1.48811	6.92049	5.08095e-06	0.00105154
Lrtm1	-1.06741	6.84509	2.03365e-05	0.00297866
Cyb5r3	-0.927778	6.82793	6.50242e-06	0.00126028
Cpd	-0.701324	6.81009	0.00023367	0.0181735
Sord	-0.756789	6.74004	0.000104784	0.0101143
Ltbp3	-0.971147	6.70857	1.3853e-05	0.00227219
Sel1l3	-0.87337	6.66536	1.53957e-05	0.00233314
Ttc9	-1.41742	6.60849	8.11631e-10	7.92834e-07
Chrna1	-1.13576	6.60525	5.79392e-06	0.00115035
Slc16a3	-0.784502	6.56771	0.000206311	0.0165534
Armcx4	-0.813275	6.55336	0.000316389	0.0226585
Atxn10	-0.755594	6.54902	8.42708e-05	0.00864696
Micall1	-1.27726	6.54769	8.6761e-05	0.00873736
Prepl	-2.04715	6.51846	9.28209e-11	1.51516e-07
Slc12a4	-0.785391	6.51756	0.000390466	0.0264877
Mllt11	-1.43637	6.48209	1.90294e-09	1.40823e-06
Prkab2	-0.922683	6.47302	3.19667e-05	0.00409706
Arhgef17	-0.898609	6.38472	5.56354e-06	0.00111366
Igdcc4	-0.790046	6.35635	0.000257775	0.0196723
Eln	-1.37448	6.30877	4.71006e-06	0.000983115
Rhoc	-1.63014	6.23633	5.15521e-09	3.49709e-06
Carhsp1	-1.49656	6.23329	7.96462e-08	2.94703e-05
Ucp2	-1.10003	6.22402	7.74193e-06	0.00142155
Pon2	-0.929413	6.18962	4.33172e-06	0.000911939
Rbm3	-0.618639	6.14834	0.000842246	0.0455055
Ankrd1	-1.51612	6.06273	2.44008e-06	0.000567516
Srpk3	-0.795549	6.05601	0.000159082	0.0136794
Plxnd1	-0.91425	6.04851	0.000244209	0.0188133
Dusp26	-0.864662	6.03088	1.54772e-05	0.00233314
Habp4	-0.807784	6.01861	9.53563e-06	0.00167532
Tspan9	-1.9117	5.98295	0.000223526	0.0176088
Chrnb1	-1.67253	5.8757	1.24958e-18	1.0172e-14
St6galnac4	-0.838057	5.83431	7.75951e-05	0.00813283
Acot9	-1.10301	5.82297	2.65512e-07	8.3129e-05
Arpp21	-0.844378	5.8158	1.24208e-05	0.00210645
Anxa4	-0.592823	5.80711	0.000752722	0.041983
Uck2	-1.75366	5.79077	6.39925e-08	2.52058e-05
Ube2o	-0.719786	5.76292	0.000477583	0.0304518
Plekho1	-1.89355	5.74983	1.28782e-11	2.41923e-08
Uhrf1bp1	-0.832815	5.6969	0.000635446	0.0376656
A430105I19Rik	-0.812059	5.58778	8.99368e-05	0.00896468
Peg3	-1.34084	5.58072	0.000149533	0.0130887
Ctsz	-1.14183	5.54791	2.28152e-06	0.000546246
Wdr13	-0.642474	5.50574	0.000818878	0.0448382
Hacd1	-0.660086	5.48844	0.000432567	0.0282453
Aida	-0.645827	5.44877	0.000362054	0.0251185
Fam189a2	-0.868716	5.37962	0.000277115	0.020759
Gga2	-1.54221	5.37505	1.79781e-08	8.77644e-06
Ccdc136	-1.48907	5.36358	2.0509e-15	6.26063e-12
Ppp1r14b	-0.978004	5.35536	9.12337e-06	0.00162629
Sync	-0.801333	5.35196	0.000290825	0.021328
F2r	-0.965751	5.3227	0.000125723	0.0115424
Cdh15	-0.683515	5.32237	0.00045738	0.0295494
Mfap5	-1.16083	5.31864	8.60971e-05	0.00873736
Gstm2	-0.696419	5.318	0.000242764	0.0187612
Kcnb1	-1.44583	5.31405	1.50961e-09	1.22887e-06
Nup210	-1.39483	5.30832	2.29247e-05	0.00325573
Cnnm4	-0.975087	5.28369	0.000157444	0.0136794
Mybph	-5.64338	5.23804	6.76066e-16	2.3586e-12
Inpp5j	-2.12073	5.18209	4.80441e-10	5.10124e-07
Atp1b2	-0.889043	5.18161	1.72537e-06	0.000425609
Bag2	-0.837948	5.16536	0.000764942	0.042456
Nlrc3	-2.06985	5.1358	1.93589e-06	0.000472764
Tmc7	-1.05506	5.11916	6.59919e-06	0.00126897
Myh8	-0.946479	5.10881	3.60389e-05	0.00449033
Slc1a1	-1.2164	5.09771	6.48641e-05	0.00704021
Krt80	-2.7111	5.07501	1.30734e-07	4.37351e-05
Ndrg4	-2.79885	5.04273	2.15724e-16	1.05364e-12
Sort1	-0.723981	5.00583	0.000283531	0.0210554
Ppm1j	-0.924814	4.99338	2.49304e-06	0.000574363
Agtrap	-0.732119	4.99082	0.000114479	0.0107526
Uchl1	-1.0838	4.95832	2.97539e-05	0.00386719
Mr1	-0.711698	4.91968	9.04768e-05	0.00898185
Rian	-3.00104	4.90946	1.40494e-05	0.00227219
Col8a1	-1.89567	4.89503	9.06417e-08	3.30382e-05
Usp20	-0.993889	4.82451	3.92565e-05	0.0047973
Zmat3	-1.12742	4.81207	6.06988e-05	0.00670735
Tm6sf1	-0.85148	4.7866	0.000285621	0.0211368
Syt12	-1.06168	4.78631	7.38378e-06	0.00139782
Plp2	-0.820102	4.77846	9.32287e-05	0.0091804
Gabbr1	-0.862765	4.77559	7.94957e-06	0.00143805
Kcng4	-2.27536	4.73257	6.8859e-12	1.40134e-08
Gck	-2.2445	4.72847	1.66292e-06	0.000414391
Sestd1	-0.723847	4.71975	0.000397932	0.0269194
Gm13889	-1.74245	4.71278	0.000825808	0.0450158
Uckl1	-0.772943	4.70184	3.32491e-05	0.00420713
Tmem132a	-1.26265	4.67931	4.62697e-05	0.00545871
Ddr1	-0.931291	4.67814	1.5316e-05	0.00233314
Tceal5	-1.0154	4.67478	1.52354e-05	0.00233314
Gusb	-1.11853	4.67295	7.54459e-09	4.97963e-06
Abat	-1.27995	4.64829	2.59862e-07	8.24167e-05
Atp1b4	-1.29241	4.62934	0.000194574	0.0157864
Loxl1	-1.00972	4.62033	0.000153223	0.0133638
Drp2	-0.930176	4.61752	0.000108014	0.0102639
Olfm1	-1.03226	4.60722	0.000721197	0.0410653
Zfp322a	-0.918985	4.59458	0.000606212	0.0361964
Klhl13	-0.927092	4.58047	0.000604681	0.0361964
Plce1	-1.06601	4.53677	2.06994e-05	0.00300043
Natd1	-0.813793	4.52719	6.18014e-05	0.00679843
Xrcc5	-0.703625	4.51397	0.000321776	0.0228195
C2cd5	-0.744308	4.51127	2.97708e-05	0.00386719
Itga9	-1.12064	4.49529	7.43978e-05	0.00786523
Serinc2	-0.687469	4.4896	0.000925059	0.0487923
Ptger1	-0.701253	4.48916	0.000825473	0.0450158
Panx1	-1.38919	4.44036	9.40243e-06	0.00166389
Rap1gap2	-0.792155	4.42709	0.000283659	0.0210554
Sema3f	-0.867375	4.41805	0.000314132	0.022563
Cul7	-0.795741	4.38609	7.98572e-05	0.00829869
Impdh1	-0.855021	4.38584	2.29305e-05	0.00325573
Slc22a4	-1.63171	4.38019	1.44552e-05	0.00229227
Tmem2	-1.21102	4.33221	1.35071e-05	0.00224393
Tspan4	-0.789567	4.32197	0.000411761	0.027437
Cln6	-0.826081	4.31912	1.85404e-05	0.00274409
Pde10a	-1.53337	4.30675	6.08483e-08	2.43778e-05
Stbd1	-0.912294	4.30159	3.74568e-05	0.00461986
Scn3b	-1.67201	4.29335	6.28234e-16	2.3586e-12
Galns	-1.56463	4.2633	1.09848e-08	5.94518e-06
Hspa4l	-0.719906	4.26253	0.000837164	0.0453312
Mamstr	-1.44507	4.19571	1.64252e-10	2.22844e-07
Sobp	-0.77828	4.18602	0.000463811	0.0298072
Mfhas1	-1.11821	4.15166	0.000103629	0.0100498
Zfp641	-0.982809	4.1272	1.63053e-05	0.00244289
Enho	-1.25403	4.09739	0.000112442	0.0106021
Bex1	-0.875012	4.07855	0.000259282	0.0197256
Cfap36	-0.645444	4.0548	0.000408387	0.0273239
Adcy1	-1.07176	4.04532	0.000182993	0.0152521
Nav2	-0.732379	4.04263	0.000908628	0.0480294
Slc25a37	-0.784272	4.02711	0.000163677	0.0140251
5930412G12Rik	-1.1569	4.01872	3.02671e-08	1.39463e-05
Mcm6	-1.51959	4.01415	5.55369e-05	0.0063377
Bak1	-0.848604	4.01373	0.000100697	0.00987597
A330074K22Rik	-1.37916	3.99551	2.07638e-05	0.00300043
B4galt5	-1.15	3.99103	0.000702904	0.040485
Tmem53	-1.5291	3.98307	4.21139e-07	0.000125568
Col23a1	-1.5256	3.97968	1.56032e-09	1.22918e-06
Plekha6	-0.824148	3.94359	0.000379578	0.0259655
Tnfrsf23	-2.64849	3.93548	8.50494e-07	0.000241511
Tmem62	-1.5447	3.9194	1.73979e-09	1.32773e-06
Gyk	-0.819511	3.87278	0.000788942	0.0435899
Dlg5	-0.871183	3.85305	0.000537967	0.03326
Serinc5	-0.715949	3.82779	0.000603358	0.0361964
Itga3	-1.04503	3.80671	0.000708545	0.0406183
Mtmr11	-0.819698	3.80466	0.000377037	0.0259369
Rnf157	-0.857898	3.77583	0.000187037	0.0154274
A830010M20Rik	-0.965775	3.76619	2.67369e-05	0.00361769
Ccdc141	-1.63329	3.75485	2.21429e-10	2.57501e-07
Tead4	-1.53584	3.74839	1.48303e-05	0.0023216
Dok5	-1.00666	3.74608	0.000141786	0.0125911
Plekhh2	-1.00336	3.70687	0.000102041	0.0099678
Ces5a	-2.49868	3.68246	5.21829e-17	3.18589e-13
Lingo3	-1.82239	3.59001	1.22312e-08	6.35527e-06
Cpeb1	-0.791584	3.56699	0.000450136	0.0291585
Prkag3	-0.875118	3.55805	0.000119934	0.0111791
Carns1	-1.27837	3.55581	1.43345e-05	0.00229227
Zfhx2	-0.95258	3.49466	7.51645e-05	0.00791204
Etv4	-1.06358	3.45932	4.09188e-06	0.000868938
Fzd10	-1.56468	3.42117	1.01291e-07	3.62828e-05
Ticam1	-1.22101	3.4044	1.49695e-06	0.00038481
Atp2b3	-0.891167	3.37393	0.000103704	0.0100498
Chrnd	-1.09439	3.32938	1.51496e-05	0.00233314
Syk	-0.947424	3.30507	6.2157e-05	0.00680688
Alox12	-1.19487	3.30187	0.000188681	0.0154624
Kcng2	-0.934377	3.27268	0.000463487	0.0298072
Pdzd3	-1.63047	3.25143	7.01858e-08	2.67814e-05
Ncs1	-0.987545	3.2164	2.44464e-05	0.00338157
Csdc2	-1.95507	3.21181	1.07034e-10	1.63368e-07
Fam65b	-1.05048	3.19936	5.08026e-05	0.00590786
Slc7a5	-1.1612	3.19822	0.000383052	0.0261299
Paqr8	-1.9646	3.19671	6.46425e-05	0.00704021
Rhbdl3	-1.40388	3.16439	1.04491e-05	0.0018227
Bace2	-1.36068	3.14602	0.000654779	0.0383899
Cd68	-1.97342	3.13086	3.79927e-06	0.000813877
Frrs1	-1.23542	3.11301	3.55413e-06	0.000781941
Me2	-1.25206	3.1084	1.19559e-05	0.00204178
Ccr2	-1.15079	3.0595	1.4406e-05	0.00229227
Mpp3	-1.26458	2.9898	0.000440856	0.0287097
Srgap3	-1.70482	2.9887	5.51705e-06	0.00111366
Serpinb1a	-1.56879	2.97697	1.11364e-05	0.0019288
Vash2	-2.97065	2.91876	1.36801e-09	1.152e-06
Mpeg1	-1.23075	2.90314	0.00012759	0.01167
Ift122	-1.30277	2.90146	0.000305299	0.0221238
Spsb2	-1.23939	2.89696	0.00049129	0.031002
Ttc39c	-1.98391	2.89461	6.67094e-10	6.78796e-07
4930513N10Rik	-1.73769	2.89167	2.06007e-10	2.51544e-07
Pir	-0.89508	2.8779	0.000129992	0.0118013
Rab29	-0.867324	2.84468	0.000229487	0.0179307
Cux2	-1.42513	2.77973	7.71208e-06	0.00142155
Sv2a	-1.77001	2.75537	1.36091e-06	0.000357364
Ccdc63	-1.60775	2.68018	1.02515e-07	3.62828e-05
Obfc1	-0.925848	2.67965	0.000342161	0.0240113
Wee1	-1.56646	2.66112	3.79624e-06	0.000813877
C1qtnf6	-0.947914	2.64096	0.000902539	0.0478111
Fam171b	-2.61767	2.61952	4.21629e-07	0.000125568
Ppp1r9a	-0.936169	2.5896	0.000129463	0.011797
Ppfia4	-2.67004	2.58036	6.76751e-08	2.62332e-05
Kcnn3	-1.91275	2.55782	3.51076e-10	3.89711e-07
Crlf1	-1.21688	2.55294	0.000206519	0.0165534
Pdk3	-1.77682	2.51052	4.76948e-08	2.0082e-05
Afmid	-0.777819	2.45906	0.000806344	0.0443822
Capn6	-1.32563	2.4447	0.000108864	0.0103045
Fam81a	-1.11222	2.42487	0.000322375	0.0228195
Faap20	-0.978082	2.41126	0.000635392	0.0376656
Fbxl2	-1.75367	2.40935	3.64471e-06	0.000794709
Cuzd1	-1.09757	2.40575	6.74012e-05	0.0072832
Arsg	-1.63345	2.39239	9.30648e-11	1.51516e-07
Chst3	-0.994524	2.38981	0.000178448	0.0150271
Unc119	-1.50107	2.38541	9.64177e-09	5.60623e-06
Gamt	-1.63547	2.37652	8.92246e-09	5.44739e-06
Sphk1	-2.11357	2.32773	1.13795e-06	0.000305383
Morc4	-0.908777	2.27951	0.000359043	0.0249806
Nudt5	-0.876317	2.27652	0.000179892	0.0150967
Prlr	-1.48724	2.21583	7.03391e-05	0.0075011
Samd10	-1.10131	2.18474	7.29301e-05	0.00774359
Nckap1l	-1.11387	2.16659	0.00072307	0.0410653
Sntb1	-1.73066	2.1484	6.67482e-06	0.00127348
Lrrc75a	-1.21185	2.11685	2.80683e-06	0.000628858
Fhad1	-2.38581	2.0361	1.15614e-07	4.03345e-05
Depdc7	-1.12371	2.01626	0.000655525	0.0383899
Chmp4c	-0.94216	2.00051	0.000594475	0.0359349
Spag5	-1.41648	1.98551	0.000186939	0.0154274
Fam19a3	-1.20573	1.97515	2.44245e-05	0.00338157
Tmem41a	-0.917255	1.85384	0.000386479	0.0262903
Cnn1	-1.22905	1.82918	0.000216331	0.0172085
Zfr2	-1.15942	1.8269	8.31638e-05	0.00856938
Dfna5	-1.81195	1.81465	1.62782e-06	0.000410792
Baiap2l1	-1.4726	1.74327	0.000340817	0.0239859
Slc37a1	-1.117	1.72166	0.000590799	0.0358903
A930003A15Rik	-1.80765	1.71822	7.51039e-06	0.00141086
Paqr7	-2.01794	1.69381	0.000401229	0.0269929
F2rl1	-1.59024	1.61882	5.19336e-05	0.0059824
Osbpl10	-1.10849	1.52063	0.000318889	0.0227043
Mtus2	-3.02936	1.47269	4.34401e-08	1.86114e-05
Gnb3	-1.39166	1.44813	2.07625e-06	0.00050202
Cgref1	-1.52407	1.44552	0.000158807	0.0136794
Kcnf1	-1.69952	1.37112	2.95649e-05	0.00386719
Fstl3	-1.41071	1.29958	0.000930577	0.0489776
Mki67	-2.49366	1.21395	2.40222e-06	0.000564083
Rdh12	-1.78164	1.19317	4.4778e-05	0.00536041
Ackr4	-1.74285	1.15617	0.000136862	0.0122879
Traf3ip3	-2.06271	1.10967	8.20747e-09	5.27459e-06
Pard6b	-1.46708	1.10597	0.000721748	0.0410653
C1qtnf3	-2.53482	1.09769	3.27457e-05	0.00416501
Enkur	-1.37362	1.02859	2.03692e-05	0.00297866
Dpep2	-1.33752	0.936396	0.000226712	0.0178024
Card14	-1.22743	0.901324	0.00066576	0.0388032
Lrp2bp	-1.61607	0.820931	0.000684737	0.0396255
Dhrs9	-2.96696	0.819063	0.000431041	0.0282211
D430019H16Rik	-1.71374	0.759886	1.47937e-05	0.0023216
Acox2	-2.55411	0.740081	1.39671e-05	0.00227219
Adam12	-2.85317	0.727958	0.000684706	0.0396255
Chrng	-4.18959	0.59518	2.96089e-06	0.000657343
Tubg2	-1.35816	0.557355	6.98337e-05	0.00747986
Pgpep1l	-1.68366	0.55731	0.000419379	0.0276056
Ttc39a	-3.01841	0.51881	1.38067e-10	1.98337e-07
Sh2d2a	-2.98045	0.457236	8.70538e-06	0.00156319
Gjd4	-2.48095	0.430525	0.000413441	0.027437
Clcnkb	-1.76046	0.429069	3.93862e-05	0.0047973
Abca4	-1.56452	0.345685	0.000605446	0.0361964
Tas1r1	-4.20815	0.305157	2.10914e-12	5.15074e-09
Ankrd34a	-2.3861	0.248013	0.000121529	0.0112846
Zfp385c	-1.41706	0.220803	0.000488318	0.0308943
Syt17	-1.57353	0.160781	5.84517e-05	0.00655313
Casr	-1.68879	0.00110165	0.000745369	0.0418931
Fhl4	-1.85373	-0.0376049	5.0699e-05	0.00590786
Atp8b4	-1.70669	-0.086348	0.000140477	0.0125663
Tmem255a	-2.10384	-0.0990393	0.000157974	0.0136794
Cenpf	-2.23005	-0.104044	0.000190618	0.0155688
Cenpe	-2.87566	-0.111829	1.29554e-05	0.00217675
Wnk3	-2.82362	-0.1886	1.22651e-07	4.17554e-05
4833422C13Rik	-1.84139	-0.225658	0.00037918	0.0259655
Icam4	-2.72911	-0.242903	3.00609e-05	0.00388422
Med9os	-3.52671	-0.291876	1.36615e-08	6.80874e-06
Dnah1	-2.10448	-0.346627	9.24759e-05	0.00914314
Baalc	-2.63239	-0.374676	2.33008e-06	0.000552455
Slc26a7	-3.37242	-0.414689	3.32818e-08	1.50514e-05
Padi4	-2.49696	-0.437162	8.18692e-05	0.00847173
Tmem125	-2.27022	-0.442218	0.000806917	0.0443822
Krt7	-2.48946	-0.477059	0.000318564	0.0227043
Tmem184a	-1.97861	-0.574299	0.000201188	0.0162689
Hmmr	-4.84778	-0.624822	9.63278e-07	0.000267321
S100a3	-4.74432	-0.658082	0.000546319	0.0336911
Nek2	-2.62821	-0.737619	0.00042786	0.0280881
Tac4	-2.862	-0.79043	0.000178059	0.0150271
Nmnat2	-1.83174	-0.810493	0.000747938	0.0418931
Gsdma	-2.27907	-0.812037	0.000106774	0.0102256
4833412C05Rik	-3.81416	-0.812474	5.55108e-06	0.00111366
Ttc39aos1	-4.58586	-0.868959	1.83284e-08	8.77644e-06
Prr11	-2.69064	-0.940786	0.000146278	0.012943
Cstad	-3.17846	-1.2779	0.000135784	0.0122361
8430431K14Rik	-3.04957	-1.38345	0.000237337	0.0184
Ttk	-3.86489	-1.42458	0.000175858	0.0149119
Sprr1a	-5.63927	-1.65125	2.5771e-05	0.00352759
Mir6358	-5.62701	-1.65501	5.53891e-05	0.0063377
Psrc1	-5.55201	-1.6948	5.91724e-05	0.0065984
Art4	-4.99016	-2.06818	0.00089738	0.0477449

## Sheet: down-regulated genes  
Down-regulated genes in Figure 2-figure supplement 2A
gene symbol	logFC	logCPM	PValue	FDR		logFC	log2 fold change
						logCPM	log2 counts per million
Lpl	0.913102	11.4385	3.71045e-05	0.00459964
Car3	1.64347	10.4657	0.000106459	0.0102256
Mdh1	0.824268	10.455	0.000499693	0.031451
Got1	0.724404	9.71429	0.000515546	0.0321999
Lpin1	0.840954	8.73949	3.5333e-05	0.00444777
Sod2	0.625471	8.34499	0.000547909	0.033704
Eif1	0.607244	8.34327	0.000752982	0.041983
Ubc	1.40225	7.81647	0.000118226	0.0110621
D10Jhu81e	0.838763	7.63876	0.000192444	0.0156656
Gpx3	0.790426	7.55942	3.94854e-05	0.0047973
Ifrd1	0.911106	7.52238	1.40191e-05	0.00227219
Vdac3	0.621815	7.47596	0.000858108	0.0460568
Oat	0.800027	7.42028	1.72094e-05	0.00256263
Nr1d1	1.08063	7.4018	0.00020674	0.0165534
Aldh1a1	1.05155	7.19106	0.00073421	0.0415049
Bckdha	0.725002	7.17793	0.000469474	0.0300507
Asb11	0.961456	7.17443	2.43471e-05	0.00338157
Pnrc1	0.75647	7.12268	0.00014117	0.0125821
Slc25a22	0.77376	6.83591	0.000533892	0.0330918
Apba3	0.592343	6.59862	0.000700868	0.0404631
Fam195a	0.96771	6.4769	0.000123668	0.0114397
Mtfp1	0.752943	6.24157	0.000281	0.0209856
Phyhd1	0.648787	6.05553	0.000586368	0.03571
Lrg1	0.753994	5.97192	0.000862461	0.0461889
Prkg1	0.997043	5.96117	0.000223156	0.0176088
Nadk2	0.668514	5.92416	0.000944709	0.049508
G0s2	2.8089	5.91622	2.55508e-06	0.000583155
Pttg1	0.82521	5.88883	8.69407e-05	0.00873736
1110001J03Rik	0.839489	5.80229	0.00064527	0.0380631
Asb14	1.12041	5.79358	0.000517666	0.0322498
Gbp6	1.18996	5.78045	0.000372064	0.0257398
Khdrbs3	0.836851	5.76272	0.000510798	0.0319851
Slc30a2	1.17203	5.71196	4.62833e-07	0.000136179
Ramp1	1.3662	5.68589	2.01337e-07	6.46955e-05
Nrep	1.1083	5.63476	0.000269036	0.0202158
L2hgdh	0.715396	5.61398	8.68491e-05	0.00873736
Gng5	0.70194	5.59863	0.00029261	0.0213947
Mrpl41	0.746971	5.55977	0.000229815	0.0179307
Lrrc14b	0.798225	5.48929	0.000287001	0.0211747
Gcdh	0.767535	5.42856	0.000350031	0.0244232
Fibin	0.63024	5.41325	0.00090185	0.0478111
Cdkal1	2.0182	5.38514	5.70313e-13	1.54751e-09
Smad3	1.08955	5.28753	2.1432e-05	0.00307877
Rnf166	0.711708	5.12913	0.000599972	0.0361776
Magix	0.847311	5.07836	8.56012e-05	0.00873736
Spr	0.744122	5.04268	0.000312949	0.0225443
Amy1	2.2131	5.00417	1.86088e-10	2.39182e-07
Anapc11	0.747505	4.99783	0.000147939	0.0129957
Cp	0.803883	4.93518	0.000107851	0.0102639
Qrsl1	0.585551	4.7847	0.000831647	0.0451343
Enpp2	0.692842	4.74847	0.000507354	0.0318511
Ttc38	0.648297	4.57538	0.000660852	0.0386092
Acot7	0.905341	4.54652	2.42794e-05	0.00338157
Ctxn3	1.75927	4.51797	1.2474e-09	1.11525e-06
Kdm1a	1.63773	4.37268	1.059e-18	1.0172e-14
Plekhb1	0.793969	4.16367	4.529e-05	0.00536907
Chodl	0.856008	4.16158	0.000728083	0.0412541
Oard1	0.724071	4.03994	0.000616867	0.0367427
Slc40a1	1.52425	4.03512	1.23107e-07	4.17554e-05
Maob	1.33674	3.99858	8.48099e-09	5.31062e-06
Ostn	2.34949	3.99106	9.25005e-07	0.00025965
Ctnna3	1.22572	3.73474	0.000742191	0.0418592
1810014B01Rik	0.841737	3.69588	0.00041816	0.0275997
Osgin1	0.86554	3.58664	1.507e-05	0.00233314
BC048679	1.45961	3.58011	1.42589e-07	4.70563e-05
Efcab6	1.07087	3.57285	0.000479557	0.0304981
Rdm1	0.907344	3.4787	0.000263539	0.0199873
Gnmt	1.09273	3.42311	0.000809727	0.0444367
Rspo3	1.21443	3.41705	0.000215926	0.0172085
Dach2	3.70411	3.37749	1.06132e-06	0.000291219
Cdh22	1.09158	3.26585	5.61157e-05	0.00637396
Alpl	0.872396	3.25677	0.000848285	0.0457306
Rpp21	0.797533	3.21466	0.000713136	0.0407857
9430038I01Rik	0.829111	3.19221	0.000295594	0.0214911
Ifi27l2a	1.19443	3.17197	6.94572e-05	0.00747231
2310020H05Rik	1.62693	3.12868	0.000187623	0.0154274
Gmnn	1.34348	3.11512	2.58564e-05	0.00352759
Acy1	0.924786	3.08592	0.000373627	0.025775
Gcat	0.824139	3.06144	0.000707012	0.0406183
Dleu2	0.853871	2.9471	0.000255364	0.0196109
4632428C04Rik	1.3272	2.71939	7.62726e-06	0.00142155
1110020A21Rik	1.06898	2.55125	0.00054953	0.0337188
9530020I12Rik	1.32504	2.49222	0.000221612	0.0175714
Fgf7	0.831321	2.4625	0.000763623	0.042456
A730036I17Rik	1.6803	2.323	0.000636995	0.037666
Kera	1.86497	2.31958	0.000519478	0.0322803
Lamb3	1.09546	2.31026	0.00065039	0.0382727
Mettl21e	3.05907	2.22435	1.76345e-07	5.74204e-05
2310065F04Rik	1.82812	2.18506	2.82049e-05	0.00376389
Adig	1.28017	2.08965	3.57519e-05	0.00447742
Gm5860	1.68914	2.00769	0.00025733	0.0196723
4933415F23Rik	3.80647	1.87422	2.46661e-09	1.77168e-06
Hnmt	1.57193	1.58557	7.01851e-07	0.000201646
Cahm	0.922253	1.52717	0.000866762	0.0463177
BB123696	1.4716	1.45643	7.87846e-06	0.00143582
Aldoart1	1.47018	1.35333	4.18587e-08	1.82541e-05
4930552P12Rik	1.07865	1.27213	0.000404167	0.0271158
E130012A19Rik	1.4456	1.25767	0.000345966	0.0242087
Acoxl	1.84124	1.21018	2.45091e-05	0.00338157
Gm5088	0.991967	1.16763	0.000268709	0.0202158
Coch	1.27199	1.0276	0.000180663	0.0151095
8430426J06Rik	2.28953	0.826992	1.11985e-08	5.94518e-06
Gm5420	1.84793	0.476405	2.90599e-07	8.98317e-05
Aldoart2	2.03509	0.352467	1.08527e-08	5.94518e-06
Clstn2	1.15667	0.308719	0.000769659	0.042621
Tmem74b	1.46386	-0.0468984	0.000135454	0.0122361
Fbn2	1.38602	-0.25161	0.000576845	0.0352179
Wnt16	1.62788	-0.286222	8.90167e-05	0.00890933
E330011O21Rik	1.57455	-0.34475	0.0001681	0.0143037
Gm15915	1.91142	-0.45937	1.45931e-06	0.000379126
Otof	1.68417	-0.516856	0.000124513	0.0114744
Kcnip2	1.83632	-0.543992	0.000166825	0.0142448
Klk1	2.17257	-0.559086	0.000486137	0.0308362
1700016C15Rik	1.58035	-0.665605	0.000576659	0.0352179
4930556G01Rik	2.75927	-0.69275	4.09292e-08	1.81733e-05
Uts2b	3.43084	-1.29878	2.4111e-08	1.13234e-05
Itga2	2.29364	-1.63685	0.000413447	0.027437
Cacna1i	2.21984	-1.6605	0.000187258	0.0154274
Gm4710	3.8188	-1.84506	1.63166e-06	0.000410792
Csn1s2b	4.22112	-1.91372	5.5458e-07	0.000161231
Serpinb2	4.56748	-2.14708	2.81525e-05	0.00376389
Gm5148	2.76554	-2.15966	0.000889291	0.0474178
Dgat2l6	2.66117	-2.21137	0.000592491	0.0359038
Prdx6b	3.78264	-2.50094	0.000831679	0.0451343
