# Supplementary material for: LSD1 defines the fiber type-selective responsiveness to environmental stress in skeletal muscle
Source: eLife. 2023 Jan 25;12:e84618. doi: 10.7554/eLife.84618 (PMC9876571; doi:10.7554/eLife.84618)
Supplement: Figure 2—source data 1. [file elife-84618-fig2-data1.xlsx]

## Sheet: up-regulated genes
Up-regulated genes in Figure 2A
gene symbol	logFC	logCPM	PValue	FDR		logFC	log2 fold change
						logCPM	log2 counts per million
H19	-1.32662	10.3107	9.26e-05	0.0137818
Hspb7	-1.29542	10.1305	0.000132199	0.0180618
Esr1	-5.94525	9.23002	2.23e-42	5.46e-38
Myl2	-1.1904	8.7465	0.000423046	0.0421682
Wnk2	-1.44109	8.18602	2.41e-05	0.00468221
Ddit4	-1.83661	7.97467	1.3e-07	6.36e-05
Gabarapl1	-1.36463	7.86572	6.04e-05	0.00943452
Padi2	-1.47746	7.71238	1.57e-05	0.00335837
Arrdc3	-1.77274	6.99756	3.39e-07	0.000147903
Clu	-1.33815	6.8329	8.63e-05	0.0129265
Myh14	-1.1811	6.77977	0.000478304	0.0454501
Car14	-1.51027	6.65584	1.07e-05	0.00243286
Ranbp9	-1.2316	6.59216	0.000282054	0.0315965
Gadd45a	-1.21817	6.5825	0.000335287	0.0352933
D230025D16Rik	-1.58806	6.52205	4.02e-06	0.00106599
Atp9a	-1.40434	6.50186	3.94e-05	0.00673163
Casq2	-1.47636	6.40809	1.69e-05	0.00355469
Chrna1	-2.70996	6.29217	1.54e-13	2.08e-10
Myom3	-1.63359	6.03474	2.28e-06	0.000678313
Spsb1	-1.23876	5.98458	0.000265945	0.0303508
Plxnd1	-1.22969	5.95447	0.000291498	0.0323158
Plbd2	-1.21569	5.93836	0.000338519	0.0353289
Kctd20	-1.23619	5.87693	0.000265356	0.0303508
Slc43a2	-1.8803	5.66163	8.62e-08	4.38e-05
Slc47a1	-1.31099	5.61531	0.000122092	0.0170378
Peg3	-1.69452	5.30919	1.07e-06	0.000384552
Ampd3	-1.56719	5.22913	6.23e-06	0.0015361
Arl4d	-1.5201	5.18197	1.21e-05	0.00265498
Sln	-2.82962	5.05316	5e-14	8.14e-11
Nqo1	-1.66487	4.98687	2.01e-06	0.000637423
Myh8	-2.20083	4.78366	8.87e-10	6.77e-07
Prepl	-1.83821	4.67495	1.79e-07	8.57e-05
Fam174b	-3.42046	4.48442	2.29e-18	6.98e-15
Ift122	-2.27432	4.40639	3.34e-10	2.91e-07
Ttc9	-1.55913	4.28949	8.99e-06	0.00211184
Postn	-1.47353	4.28304	2.78e-05	0.00517398
Rab15	-2.35661	4.28254	1.24e-10	1.16e-07
Ifi30	-1.47461	4.21866	2.71e-05	0.00512533
Myl6b	-1.92476	4.20581	8.11e-08	4.21e-05
Myog	-1.80892	4.19501	3.66e-07	0.000157009
Pde8a	-1.18925	4.08652	0.000503949	0.0476067
Tmem132a	-1.70257	3.78169	1.77e-06	0.000576959
Cables1	-1.59867	3.68098	6.82e-06	0.0016488
Zfp52	-1.43642	3.64514	5.13e-05	0.00829286
Ehd3	-1.32704	3.58765	0.000144682	0.0194137
Garem	-1.50167	3.56092	1.96e-05	0.00398361
Slc1a1	-1.30421	3.30347	0.000213511	0.0262137
Rian	-1.34794	3.27566	0.000128739	0.0177624
Kcnk5	-3.13156	3.14944	3.81e-15	8.47e-12
Lpin2	-1.3322	3.12251	0.000177822	0.0228558
Runx1	-1.44552	3.07088	5.34e-05	0.00858066
Slc10a6	-1.34952	3.05863	0.000143681	0.0193858
Srrm4os	-3.01573	2.97503	1.16e-13	1.77e-10
Dusp4	-1.83126	2.90295	6.5e-07	0.000240562
Wdr62	-1.27664	2.81663	0.000326937	0.0347136
Abca4	-2.22773	2.80239	4.14e-09	2.81e-06
Etv4	-1.39699	2.78277	0.00012027	0.01688
Inpp5j	-1.85089	2.76809	5.68e-07	0.000216853
Atp1b4	-1.36678	2.61505	0.000167492	0.0217571
Peg10	-1.62422	2.48429	1.18e-05	0.00262153
Zim1	-2.1472	2.43842	1.29e-08	8.06e-06
Calml4	-2.0746	2.42454	6.52e-08	3.46e-05
Chrna9	-2.14153	2.39279	2.59e-08	1.58e-05
Pla2g5	-1.52957	2.31091	4.41e-05	0.00738265
A330074K22Rik	-1.60351	2.19921	1.23e-05	0.00267415
Crybb1	-1.60802	2.19764	1.99e-05	0.00400884
Chil3	-2.06063	2.17488	4.45e-07	0.000181069
Mchr1	-1.28337	2.13388	0.000452017	0.0445109
N4bp2	-1.38056	2.11858	0.000168547	0.0217782
Ngp	-2.80961	2.05159	4.63e-10	3.9e-07
Lonrf3	-1.4396	2.02561	0.000132388	0.0180618
Hsbp1l1	-1.63874	2.01316	2.58e-05	0.00495406
C530008M17Rik	-1.38924	1.92506	0.000209128	0.0259244
Cux2	-1.57425	1.8823	4.11e-05	0.00692666
Atcay	-1.35391	1.84993	0.000303618	0.032954
Paqr7	-1.6461	1.83762	3.04e-05	0.00554212
Pdzd3	-2.83362	1.78063	4.78e-11	4.67e-08
Ibsp	-2.14973	1.68364	2.24e-06	0.000676356
Top2a	-2.135	1.61449	7.68e-07	0.000279951
Chrnd	-1.82893	1.6058	3.2e-06	0.000929111
4930513N10Rik	-2.3298	1.60256	4.69e-08	2.6e-05
Nlrc3	-3.45254	1.57639	4.23e-14	7.38e-11
Arc	-1.44087	1.5685	0.000281796	0.0315965
Mmp13	-3.24455	1.53616	1.34e-10	1.21e-07
Ppfia4	-1.60966	1.52332	8.35e-05	0.0126639
Cdhr3	-2.4775	1.50804	2.64e-09	1.84e-06
Spsb4	-1.44023	1.48218	0.000244795	0.0284673
Galns	-1.60085	1.47995	6.07e-05	0.00943452
Rnf39	-2.33183	1.31656	4.57e-08	2.6e-05
5930412G12Rik	-1.77882	1.28837	1.71e-05	0.00357389
Dhrs13	-1.42861	1.26798	0.000529959	0.0490232
Pcnxl2	-1.44054	1.08349	0.000375269	0.0386686
L1td1	-4.39843	1.03418	1.24e-13	1.79e-10
Mki67	-1.89892	0.950201	2.68e-05	0.00512043
Fzd10	-1.57471	0.910425	0.000157672	0.0207016
Kcng2	-1.71948	0.868051	6.02e-05	0.00943452
Cyp1a1	-1.59014	0.80118	0.000295338	0.0324885
Pou5f1	-2.30792	0.783287	5.65e-06	0.00145236
Prc1	-1.54034	0.720552	0.000296719	0.0324941
Ltf	-2.07396	0.657	5.49e-05	0.00870315
Dppa5a	-2.884	0.649489	1.14e-07	5.66e-05
Gpr179	-1.56693	0.614605	0.000464596	0.0452028
Mybl2	-2.33622	0.60558	3.65e-06	0.000989155
Acox2	-3.34267	0.587629	1.78e-09	1.28e-06
Cdkl1	-1.87189	0.561753	3.35e-05	0.00601828
Kif11	-1.79888	0.470886	0.000181208	0.0230727
Gldc	-1.71439	0.458707	0.000397664	0.0406332
Plekhh1	-1.55715	0.444079	0.000403387	0.0407083
Aox4	-6.03824	0.407733	4.44e-15	9.03e-12
Poln	-2.4736	0.393888	2.81e-07	0.000127072
Ffar4	-2.03376	0.214325	0.000161414	0.0210796
Ccnf	-1.62137	0.20057	0.000517471	0.0482334
Dnmt3l	-2.58842	0.131417	5.97e-06	0.00149634
2610028H24Rik	-1.93597	0.129517	0.000195572	0.0243677
Rdh12	-1.75119	0.000876261	0.000241787	0.0282521
Foxp3	-3.09828	-0.0165239	3.36e-08	2e-05
Ccne1	-1.7304	-0.05509	0.000476711	0.0454501
Lama1	-2.25453	-0.102837	0.000117038	0.0166057
Igfbp2	-2.63694	-0.105371	1.12e-05	0.00252272
Mpo	-2.37009	-0.1209	0.000127564	0.0177002
Cdca7	-2.03002	-0.13783	0.000235532	0.0279719
Dusp9	-2.51695	-0.196554	3.23e-05	0.00583787
Zfp42	-3.91834	-0.263021	6.33e-08	3.43e-05
Bub1	-2.67727	-0.268445	1.05e-05	0.00241796
Ces5a	-2.34793	-0.302407	0.000288713	0.0321948
Gtse1	-2.41523	-0.365077	3.98e-05	0.00674428
Stk33	-5.10519	-0.381248	7.09e-09	4.68e-06
Lincenc1	-2.55584	-0.387563	4.71e-05	0.00771914
Brca1	-2.10156	-0.470515	0.000185894	0.0235219
Nanog	-3.22752	-0.477941	3.99e-06	0.00106599
Dctd	-2.40186	-0.481403	0.000221219	0.027012
Stxbp5l	-3.10988	-0.563459	2.73e-05	0.00513713
A930018P22Rik	-2.14498	-0.568019	0.000429222	0.0426099
Utf1	-3.14365	-0.569541	3.36e-06	0.000943648
Foxm1	-2.28573	-0.630242	0.000154416	0.0203837
Aard	-2.19526	-0.696352	0.000227162	0.027463
Fam169b	-2.70304	-0.709368	1.89e-05	0.00391656
Cd101	-3.692	-0.874472	1.6e-05	0.00339734
Tnn	-3.63509	-0.932117	7.3e-06	0.00174768
Prg2	-2.27821	-1.02154	0.000476729	0.0454501
C2cd4b	-4.3184	-1.02359	3.33e-06	0.000943648
Sell	-2.92782	-1.06498	3.48e-05	0.00611795
Zfp92	-4.25596	-1.07691	5.81e-06	0.00147778
Sec1	-3.38626	-1.11538	4.55e-05	0.00750174
Dppa4	-3.19896	-1.20989	0.000241457	0.0282521
Trip13	-3.1928	-1.2311	0.000402715	0.0407083
Sohlh2	-2.87897	-1.43902	0.000543194	0.0497676
Tcl1	-3.66033	-1.49492	0.000146006	0.0194842
Zscan10	-5.50636	-1.5538	2.17e-05	0.00430702
Catsperg1	-5.25886	-1.7079	0.000241705	0.0282521

## Sheet: down-regulated genes
Down-regulated genes in Figure 2A
gene symbol	logFC	logCPM	PValue	FDR		logFC	log2 fold change
						logCPM	log2 counts per million
Tnnc2	1.16726	13.8703	0.000187458	0.0235975
Pvalb	1.51137	12.9617	1.33e-06	0.000456902
Myl1	1.45033	12.2644	3.47e-06	0.000952513
Myh1	1.21956	11.365	9.52e-05	0.0140917
Car3	1.79278	10.8767	1.03e-08	6.61e-06
Trdn	1.59781	10.757	3.23e-07	0.000143558
Atp5e	1.15158	9.94209	0.000229541	0.0276139
Ppp1r3c	1.4806	9.4197	2.19e-06	0.000674127
Rps21	1.1198	8.55631	0.000343229	0.0356681
Asb5	1.12593	8.49469	0.000320338	0.0341614
Phka1	1.29519	8.46052	3.47e-05	0.00611795
Ndufa2	1.17082	8.39401	0.0001814	0.0230727
Rpl37a	1.08806	8.33799	0.000504899	0.0476067
Dhrs7c	1.19147	7.54069	0.000141385	0.019182
Smox	1.13196	7.33342	0.000301879	0.0329116
Gpd2	1.13944	6.87622	0.000280495	0.0315965
Myeov2	1.21112	6.85993	0.000110642	0.015894
Aldh1a1	1.49356	6.68821	1.93e-06	0.000618909
Mrln	1.95182	6.18622	5.86e-10	4.61e-07
Sorbs2	1.2209	6.18043	0.000102727	0.0148444
Tspan8	1.5353	5.86364	1.09e-06	0.000384552
Crip1	1.19177	5.67455	0.000150741	0.0200067
Ankrd1	1.30404	5.66948	3.39e-05	0.00603913
Nrep	2.11947	5.65158	2.11e-11	2.31e-08
Mettl21c	2.47565	5.56182	7.7e-15	1.45e-11
2210408F21Rik	1.11366	5.31347	0.000409065	0.0411102
Asb15	1.35016	5.25778	1.96e-05	0.00398361
1500012F01Rik	1.22908	5.12012	9.76e-05	0.0142686
Nrtn	1.58849	4.93736	4.97e-07	0.000192476
G0s2	1.33395	4.89112	2.42e-05	0.00468221
Flrt1	2.60107	4.79253	7.9e-16	1.93e-12
Amy1	1.44085	4.78835	5.52e-06	0.00143374
Mss51	3.87814	4.60008	2.68e-30	3.27e-26
Retnla	1.5047	4.59068	2.08e-06	0.000651186
2310065F04Rik	3.15956	4.55312	8.09e-22	4.94e-18
Kdm1a	1.53042	4.53172	1.45e-06	0.0004931
Gm15417	1.60103	4.46372	4.66e-07	0.000186613
Arhgap26	1.33399	4.41397	2.82e-05	0.00521476
Kcnf1	3.25627	4.34648	1.07e-22	8.71e-19
9530091C08Rik	1.43905	4.1498	6.59e-06	0.00160883
Sh2d7	1.10426	4.13525	0.00052171	0.0484437
2310009B15Rik	1.34162	3.70393	2.85e-05	0.00522929
Lrrc38	1.12532	3.64388	0.000469099	0.0454501
Zfp423	1.13203	3.58777	0.000475856	0.0454501
E030003E18Rik	1.33883	3.4626	3.88e-05	0.00672656
Pf4	1.16899	3.34767	0.000292445	0.0323158
Cilp2	1.15249	3.22508	0.000403399	0.0407083
Polk	1.34929	3.12618	3.85e-05	0.00671481
Npnt	1.16205	3.10016	0.00037965	0.0389556
1600002K03Rik	1.16583	3.08322	0.000333791	0.0352879
Mettl21e	2.95197	3.04178	3.59e-18	9.73e-15
Tnmd	1.26662	2.93727	0.000102495	0.0148444
Ptx3	1.33664	2.91392	4.99e-05	0.00812338
1700001O22Rik	1.56835	2.5485	2.61e-06	0.000767485
Greb1	1.71529	2.51469	2.78e-07	0.000127072
1700120C14Rik	1.82209	2.51328	4.59e-08	2.6e-05
Itgb6	1.3588	2.3505	6.13e-05	0.00947062
Nnmt	1.16395	2.34558	0.000446254	0.0441213
Kcnab1	1.5394	2.15543	6e-06	0.00149634
Orm1	1.71579	2.13463	4.21e-07	0.000177117
Gm4841	1.73477	2.1059	2.67e-07	0.00012525
BC002163	1.597	1.99856	3.29e-06	0.000943648
Cacna2d4	1.3872	1.9345	6.73e-05	0.010271
Cntnap2	1.59491	1.8884	4.7e-06	0.00123346
Gm12338	2.33649	1.8881	3.1e-11	3.16e-08
Gdap1	1.69786	1.85857	1.17e-06	0.000407372
Lrp2bp	1.73679	1.80481	6e-07	0.000225493
2310015D24Rik	2.39933	1.78703	2.18e-11	2.31e-08
Gm5860	2.18799	1.70948	5.59e-10	4.55e-07
Hoxc8	1.19579	1.6974	0.000455766	0.0446999
8430426J06Rik	1.76314	1.59442	4.91e-07	0.000192476
Rps15a-ps6	2.53916	1.56198	8.16e-12	9.49e-09
Ostn	2.52295	1.49929	7.4e-12	9.04e-09
1110020A21Rik	1.38774	1.31545	9.58e-05	0.0140917
Ccdc146	1.6678	1.27702	3.42e-06	0.000948775
BB123696	2.26992	1.17054	1.15e-09	8.52e-07
1110046J04Rik	1.41128	1.14043	0.000114793	0.0163939
4632428C04Rik	1.63539	1.02065	9.83e-06	0.00228681
Nr2c2ap	1.45354	0.936376	6.38e-05	0.00979771
Orm3	4.09846	0.919919	9.9e-21	4.84e-17
Apoh	1.426	0.751644	0.000213608	0.0262137
Dach2	3.90889	0.733821	5.61e-19	2.28e-15
1810041H14Rik	1.83289	0.658994	1.52e-06	0.000507553
Otog	1.84526	0.635794	2.21e-06	0.000674127
4933415F23Rik	4.08483	0.60361	8.62e-19	3.01e-15
Mir682	1.45926	0.578526	0.000117636	0.0166057
Snap25	1.94694	0.477973	4.43e-07	0.000181069
Rmi2	1.3925	0.252022	0.000515122	0.0482334
Klk1b22	1.8336	0.21906	1.15e-05	0.00257383
Cd209d	1.91027	0.0216485	8.15e-06	0.00193125
Gm15421	1.73853	-0.160744	4.51e-05	0.00748881
Gm15441	1.53389	-0.296726	0.00036906	0.0381899
Kcnv2	2.30206	-0.343142	1.56e-06	0.000515561
Rab26os	1.60126	-0.366093	0.00030593	0.0330581
Hpcal4	1.77028	-0.448452	8.5e-05	0.0128184
Gm19299	3.50163	-0.450181	3.89e-12	5e-09
Opn1mw	1.75336	-0.505343	0.000232723	0.0278595
4933428G20Rik	1.64227	-0.545057	0.000310182	0.0333699
Slc4a10	2.31325	-0.930713	2.24e-05	0.0044057
Rab39	1.82437	-0.97577	0.000476873	0.0454501
Eldr	2.35258	-1.10765	2.05e-05	0.00410064
A630075F10Rik	2.13355	-1.21412	0.000226381	0.027463
Xrra1	2.57731	-1.26699	3.94e-05	0.00673163
Cadps	2.19378	-1.37853	0.000337395	0.0353289
Prickle4	2.2	-1.38357	0.000259353	0.0300174
Rnf112	1.95994	-1.42549	0.00041607	0.0416428
Zcchc12	2.19592	-1.4956	0.000314559	0.0336923
Rnf182	2.26697	-1.55991	0.000516113	0.0482334
Sorbs2os	2.75681	-1.58231	0.000267205	0.0303508
Themis3	3.00137	-1.63975	5.45e-05	0.00869882
Gm13446	2.64885	-1.64584	0.000267205	0.0303508
Foxg1	2.21447	-1.73209	0.000462865	0.0452028
Oog4	3.61986	-1.84625	1.36e-05	0.00294144
Gm10549	3.38101	-1.94444	0.000190211	0.0238212
Ucma	4.7605	-2.3362	0.000235953	0.0279719
Neurod6	4.62524	-2.38587	0.00054412	0.0497676
4930571O06Rik	4.44608	-2.44644	0.00054412	0.0497676
