# Supplementary material for: LSD1 defines the fiber type-selective responsiveness to environmental stress in skeletal muscle
Source: eLife. 2023 Jan 25;12:e84618. doi: 10.7554/eLife.84618 (PMC9876571; doi:10.7554/eLife.84618)
Supplement: Supplementary file 1. [file elife-84618-supp1.xlsx]

## Sheet: Suppl File 1 (Dex DEGs Top50)
Supplementary File 1. Top 50 differentially regulated genes in Dex-treated LSD1-mKO mice
Up-regulated
Gene Name	WT1	WT2	WT3	KO1	KO2	KO3	KO4	KO5	logFC	logCPM	PValue	FDR
H19	643.989	787.649	529.428	2914	2281.15	972.813	892.318	1137.6	-1.32662	10.3107	9.26e-05	0.0137818
Hspb7	575.57	588.73	596.993	1879.1	1879.72	1402.83	874.375	1168.94	-1.29542	10.1305	0.000132199	0.0180618
Esr1	20.6064	15.7131	9.79497	903.027	1473.46	650.201	1132.77	597.458	-5.94525	9.23002	2.23e-42	5.46e-38
Myl2	219.265	146.77	349.221	715.717	763.489	342.855	358.494	539.022	-1.1904	8.7465	0.000423046	0.0421682
Wnk2	179.866	189.127	52.1732	518.764	497.959	376.683	284.445	229.489	-1.44109	8.18602	2.41e-05	0.00468221
Ddit4	164.852	63.1372	61.0686	302.753	278.611	795.602	156.386	188.721	-1.83661	7.97467	1.3e-07	6.36e-05
Gabarapl1	134.975	161.23	55.9712	172.618	211.42	764.867	178.154	185.635	-1.36463	7.86572	6.04e-05	0.00943452
Padi2	125.805	103.502	67.7652	513.806	303.189	250.988	150.192	161.1	-1.47746	7.71238	1.57e-05	0.00335837
Arrdc3	64.8423	29.946	57.7703	56.3113	176.535	457.387	73.1378	105.377	-1.77274	6.99756	3.39e-07	0.000147903
Clu	51.3398	51.6939	71.7631	269.958	174.025	91.9347	84.3408	115.596	-1.33815	6.8329	8.63e-05	0.0129265
Myh14	65.3461	72.3601	45.8764	178.531	137.489	142.845	97.5475	137.736	-1.1811	6.77977	0.000478304	0.0454501
Car14	62.7262	54.4836	22.6883	239.209	163.586	105.385	65.396	91.6465	-1.51027	6.65584	1.07e-05	0.00243286
Ranbp9	50.9871	57.9564	47.8754	85.7405	78.4895	340.031	57.563	52.1565	-1.2316	6.59216	0.000282054	0.0315965
Gadd45a	35.9227	35.4684	85.8559	69.0473	116.149	308.96	36.8877	77.4897	-1.21817	6.5825	0.000335287	0.0352933
D230025D16Rik	37.535	60.3475	24.0876	41.0736	77.961	405.804	48.455	38.9577	-1.58806	6.52205	4.02e-06	0.00106599
Atp9a	51.9444	51.5801	30.0845	186.491	129.825	98.7272	79.0581	95.9042	-1.40434	6.50186	3.94e-05	0.00673163
Casq2	41.9182	38.9982	39.3798	126.496	173.827	72.0278	78.8759	106.655	-1.47636	6.40809	1.69e-05	0.00355469
Chrna1	17.2308	17.1364	18.1907	205.868	135.11	71.4226	71.9538	88.5597	-2.70996	6.29217	1.54e-13	2.08e-10
Myom3	32.3959	36.607	15.592	145.509	131.477	67.9254	49.639	43.9073	-1.63359	6.03474	2.28e-06	0.000678313
Spsb1	52.952	21.8048	27.5858	63.498	69.7024	179.094	41.4417	49.3358	-1.23876	5.98458	0.000265945	0.0303508
Plxnd1	36.225	44.3497	20.0897	119.445	120.179	56.3579	60.2044	37.9465	-1.22969	5.95447	0.000291498	0.0323158
Plbd2	37.7869	43.325	19.1901	99.4317	69.7685	98.4582	57.8363	63.4926	-1.21569	5.93836	0.000338519	0.0353289
Kctd20	36.3762	50.7261	7.79599	41.4375	81.6608	152.53	62.026	36.5096	-1.23619	5.87693	0.000265356	0.0303508
Slc43a2	20.3041	22.3741	13.7929	58.1762	53.7799	176.337	34.0642	25.0138	-1.8803	5.66163	8.62e-08	4.38e-05
Slc47a1	29.1211	29.4906	17.3911	94.1099	69.0417	42.3021	45.085	64.2377	-1.31099	5.61531	0.000122092	0.0170378
Peg3	22.6217	22.7726	3.6981	35.4788	73.5344	118.231	27.4153	12.294	-1.69452	5.30919	1.07e-06	0.000384552
Ampd3	21.9164	15.3146	12.9933	47.3051	40.6983	103.099	32.3337	25.28	-1.56719	5.22913	6.23e-06	0.0015361
Arl4d	16.1728	12.0126	21.9887	33.6139	24.1811	151.857	11.8405	17.7226	-1.5201	5.18197	1.21e-05	0.00265498
Sln	4.33289	5.86396	10.5946	70.4118	106.37	22.1262	18.2161	26.3444	-2.82962	5.05316	5e-14	8.14e-11
Nqo1	12.9987	13.0943	14.0928	87.9693	56.0262	25.4888	18.3983	24.1091	-1.66487	4.98687	2.01e-06	0.000637423
Myh8	9.52229	12.4111	3.09841	48.2148	41.2268	19.5706	15.757	68.9211	-2.20083	4.78366	8.87e-10	6.77e-07
Prepl	11.9407	14.0621	2.89851	59.0404	53.1192	25.6906	19.5824	16.5517	-1.83821	4.67495	1.79e-07	8.57e-05
Fam174b	2.77104	3.81442	2.79856	85.1492	47.3051	16.9477	10.8386	7.71704	-3.42046	4.48442	2.29e-18	6.98e-15
Ift122	10.3284	5.29464	2.69861	59.1314	33.1664	12.3745	19.0359	26.025	-2.27432	4.40639	3.34e-10	2.91e-07
Ttc9	8.46426	9.67838	8.09584	36.525	37.0645	15.1319	19.3091	20.9158	-1.55913	4.28949	8.99e-06	0.00211184
Postn	8.16196	5.80703	13.693	24.8352	36.4699	21.5209	18.1251	26.0783	-1.47353	4.28304	2.78e-05	0.00517398
Rab15	4.28251	8.19815	3.59815	45.4402	38.9805	23.2695	14.4818	16.0195	-2.35661	4.28254	1.24e-10	1.16e-07
Ifi30	6.54972	8.42588	11.3941	30.4754	19.5563	46.3372	10.5654	14.4761	-1.47461	4.21866	2.71e-05	0.00512533
Myl6b	6.80164	5.92089	7.29625	25.4265	27.881	23.2022	26.3223	23.7365	-1.92476	4.20581	8.11e-08	4.21e-05
Myog	6.49934	9.05213	5.59712	78.7357	21.7366	7.53232	5.00944	10.4313	-1.80892	4.19501	3.66e-07	0.000157009
Pde8a	12.1926	13.3789	2.19887	25.6539	27.1542	20.3776	19.0359	14.6358	-1.18925	4.08652	0.000503949	0.0476067
Tmem132a	6.29781	6.14862	4.39774	37.3892	26.5596	7.46507	9.01699	11.2296	-1.70257	3.78169	1.77e-06	0.000576959
Cables1	5.29016	6.54714	4.89748	16.2384	8.32465	45.3284	7.83294	7.02517	-1.59867	3.68098	6.82e-06	0.0016488
Zfp52	5.13901	6.26248	6.59661	22.2425	21.208	20.0414	9.65456	7.77026	-1.43642	3.64514	5.13e-05	0.00829286
Ehd3	7.70852	7.05952	3.39825	23.789	17.376	13.9886	13.1156	8.46213	-1.32704	3.58765	0.000144682	0.0194137
Garem	6.29781	6.94566	2.89851	9.91588	15.1958	28.986	15.3926	7.82348	-1.50167	3.56092	1.96e-05	0.00398361
Slc1a1	7.10393	4.66839	3.29831	15.4651	16.7154	14.2576	7.46862	8.72824	-1.30421	3.30347	0.000213511	0.0262137
Rian	6.75125	4.83919	2.79856	18.7401	15.5922	12.778	8.10619	6.54618	-1.34794	3.27566	0.000128739	0.0177624
Kcnk5	1.61224	1.76488	0.999486	3.63886	9.31567	38.9394	9.74564	4.15123	-3.13156	3.14944	3.81e-15	8.47e-12
Lpin2	4.23213	5.12385	3.79805	7.14125	9.18354	27.2374	7.46862	4.52378	-1.3322	3.12251	0.000177822	0.0228558
Down-regulated
Gene Name	WT1	WT2	WT3	KO1	KO2	KO3	KO4	KO5	logFC	logCPM	PValue	FDR
Tnnc2	17656.9	12717.2	38393.5	9056.75	8045.17	6075.22	9304.17	18551.5	1.16726	13.8703	0.000187458	0.0235975
Pvalb	10044.5	7370.54	22859.4	3678.11	3125.44	3082	3970.57	9689.09	1.51137	12.9617	1.33e-06	0.000456902
Myl1	9201.15	7349.87	7895.84	2179.31	2589.03	1996.27	3912.92	4232.61	1.45033	12.2644	3.47e-06	0.000952513
Myh1	5221.79	4463.04	2612.66	518.764	1398.74	783.025	3504.79	2596.33	1.21956	11.365	9.52e-05	0.0140917
Car3	3529.34	2547.06	4079.4	396.635	755.561	388.385	1943.94	1400.94	1.79278	10.8767	1.03e-08	6.61e-06
Trdn	2009.1	1694.57	5224.72	314.579	762.168	805.488	1236.88	1797.01	1.59781	10.757	3.23e-07	0.000143558
Atp5e	755.385	628.753	3112.5	616.286	442.858	344.2	393.924	1575.5	1.15158	9.94209	0.000229541	0.0276139
Ppp1r3c	1663.68	874.527	891.442	668.23	506.614	109.353	293.28	470.633	1.4806	9.4197	2.19e-06	0.000674127
Rps21	304.008	234.217	1166.4	254.72	182.349	182.793	194.184	492.666	1.1198	8.55631	0.000343229	0.0356681
Asb5	501.86	465.928	667.957	15.2377	282.575	198.127	400.118	353.334	1.12593	8.49469	0.000320338	0.0341614
Phka1	560.405	655.568	461.663	124.904	236.856	194.025	332.171	251.629	1.29519	8.46052	3.47e-05	0.00611795
Ndufa2	243.146	205.58	1097.94	219.878	142.048	134.439	147.733	500.17	1.17082	8.39401	0.0001814	0.0230727
Rpl37a	222.741	176.431	1052.16	222.38	164.114	156.296	159.482	434.868	1.08806	8.33799	0.000504899	0.0476067
Dhrs7c	289.447	249.531	321.735	115.488	122.623	42.5038	141.266	206.125	1.19147	7.54069	0.000141385	0.019182
Smox	280.026	295.304	156.819	120.946	100.953	94.154	121.046	119.8	1.13196	7.33342	0.000301879	0.0329116
Gpd2	185.962	185.939	162.516	36.616	56.2244	79.0894	128.06	104.579	1.13944	6.87622	0.000280495	0.0315965
Myeov2	96.281	65.756	378.505	65.4994	57.6779	47.4805	50.1855	167.646	1.21112	6.85993	0.000110642	0.015894
Aldh1a1	179.211	198.008	140.328	35.2514	53.7138	50.6414	73.0468	93.7753	1.49356	6.68821	1.93e-06	0.000618909
Mrln	84.9449	84.8281	237.378	8.09645	14.7333	9.61716	46.1779	96.596	1.95182	6.18622	5.86e-10	4.61e-07
Sorbs2	114.62	132.252	90.7534	22.6064	42.8785	24.9508	82.337	68.9211	1.2209	6.18043	0.000102727	0.0148444
Tspan8	82.0731	67.5778	145.825	4.776	23.2562	17.2167	59.9311	64.8231	1.5353	5.86364	1.09e-06	0.000384552
Crip1	37.8876	34.8422	163.716	33.3865	29.7309	19.8396	30.421	58.5963	1.19177	5.67455	0.000150741	0.0200067
Ankrd1	29.6753	25.6762	188.103	21.6057	66.1347	16.4097	19.9467	39.7028	1.30404	5.66948	3.39e-05	0.00603913
Nrep	116.232	87.8455	85.8559	19.7863	19.6884	8.1376	30.6942	32.9438	2.11947	5.65158	2.11e-11	2.31e-08
Mettl21c	81.7204	99.7442	108.744	2.63817	10.1085	1.95033	27.7796	44.5459	2.47565	5.56182	7.7e-15	1.45e-11
2210408F21Rik	37.9884	39.3398	102.347	25.29	24.1811	18.8981	23.681	45.9297	1.11366	5.31347	0.000409065	0.0411102
Asb15	73.2058	63.5357	47.5756	4.82148	20.6795	12.1055	46.7244	36.5628	1.35016	5.25778	1.96e-05	0.00398361
1500012F01Rik	24.1332	21.6909	117.04	17.1481	16.8475	34.5007	13.6621	33.1034	1.22908	5.12012	9.76e-05	0.0142686
Nrtn	28.5669	25.3915	103.947	12.2811	9.18354	10.0207	13.6621	41.8849	1.58849	4.93736	4.97e-07	0.000192476
G0s2	54.2116	22.2603	66.166	22.288	15.5922	6.52353	18.2161	31.4004	1.33395	4.89112	2.42e-05	0.00468221
Flrt1	60.3582	42.9834	69.964	1.77394	2.18026	2.21934	21.5861	20.1175	2.60107	4.79253	7.9e-16	1.93e-12
Amy1	42.4221	36.7778	57.3705	6.27703	8.91926	15.8044	24.0453	28.8458	1.44085	4.78835	5.52e-06	0.00143374
Mss51	60.2575	46.3423	66.7657	0.409371	0.726755	1.00879	11.4762	6.49296	3.87814	4.60008	2.68e-30	3.27e-26
Retnla	18.3896	18.6166	84.6565	10.1888	16.0547	7.46507	12.7513	24.5881	1.5047	4.59068	2.08e-06	0.000651186
2310065F04Rik	13.0491	9.84917	40.0794	7.68708	5.21942	5.38023	6.19349	16.4453	3.15956	4.55312	8.09e-22	4.94e-18
Kdm1a	38.4922	35.8669	42.4782	12.827	12.6852	16.746	14.0264	11.1232	1.53042	4.53172	1.45e-06	0.0004931
Gm15417	24.234	23.5128	66.166	8.96068	8.12644	8.74287	12.8424	23.6301	1.60103	4.46372	4.66e-07	0.000186613
Arhgap26	58.2926	24.4806	18.9902	10.0978	17.7725	12.8453	17.1232	9.73943	1.33399	4.41397	2.82e-05	0.00521476
Kcnf1	98.6489	28.1242	9.99486	2.00137	4.16232	0.538023	11.7494	5.8543	3.25627	4.34648	1.07e-22	8.71e-19
9530091C08Rik	34.0586	31.7678	21.389	8.2784	11.2977	13.5851	9.56348	10.9635	1.43905	4.1498	6.59e-06	0.00160883
Sh2d7	18.2888	15.7701	45.0768	12.0992	9.44781	7.06155	10.9297	21.3948	1.10426	4.13525	0.00052171	0.0484437
2310009B15Rik	54.0604	51.4093	51.9733	2.18331	4.6248	1.07605	11.9316	9.79266	1.34162	3.70393	2.85e-05	0.00522929
Lrrc38	19.498	22.5449	13.9928	11.3714	8.39071	3.16089	11.1119	8.83468	1.12532	3.64388	0.000469099	0.0454501
Zfp423	26.9546	16.8518	9.99486	5.18537	8.45678	6.05276	12.5691	8.99434	1.13203	3.58777	0.000475856	0.0454501
E030003E18Rik	24.2844	26.2455	1.49923	3.72983	6.47472	6.65803	9.19916	8.62179	1.33883	3.4626	3.88e-05	0.00672656
Pf4	7.55737	9.96303	29.285	5.7312	5.61583	4.03517	7.1043	11.8151	1.16899	3.34767	0.000292445	0.0323158
Cilp2	11.4872	12.525	18.3905	6.368	4.75694	4.10243	9.56348	6.97194	1.15249	3.22508	0.000403399	0.0407083
Polk	17.3316	14.5176	9.59507	3.77531	6.21045	3.09363	9.10807	5.21565	1.34929	3.12618	3.85e-05	0.00671481
Npnt	13.704	17.6488	7.1963	6.00411	7.06934	4.30418	6.37565	5.10921	1.16205	3.10016	0.00037965	0.0389556
1600002K03Rik	8.46426	5.5793	24.8872	4.27565	4.03019	4.97671	5.73809	9.52655	1.16583	3.08322	0.000333791	0.0352879
