# Supplementary material for: LSD1 defines the fiber type-selective responsiveness to environmental stress in skeletal muscle
Source: eLife. 2023 Jan 25;12:e84618. doi: 10.7554/eLife.84618 (PMC9876571; doi:10.7554/eLife.84618)
Supplement: Supplementary file 2. [file elife-84618-supp2.xlsx]

## Sheet: Suppl File 2 (VWR cluster6)
Supplementary File 2. Cluster 6 genes in Figure 5A
Gene Name	WTex_1	WTex_2	WTex_3	KOex_1	KOex_2	KOex_3
Acadsb	88.05	91.56	94.38	108.89	103.39	115
Acsl1	408.16	414.23	373.86	477.07	411.83	494.87
Actn3	55.62	44.73	131.93	322.82	107.74	224.24
Adk	121.63	137.51	115.77	128.39	124.97	139.36
Aes	948.41	963.85	891.82	1012.32	1085.93	1098.6
Akap1	75.47	89.73	69.13	100.45	92.24	130.58
Amotl1	161.68	162.5	146.3	191.03	160.44	218.09
Ankrd23	1971.41	1989.87	1368.67	2157.12	2350.68	2188.78
Ankrd40	158.83	161.21	150.14	166.38	175.49	190.79
Arl1	126.49	153.67	138.79	137.38	157.03	145.97
Asb11	208.81	162.19	173.67	227.74	209.39	199.57
Asb5	222.03	183.92	146.81	331.43	193.96	196.08
Atcayos	145.76	121.4	97.01	156.28	162.9	117.24
Atp5c1	1501.11	1412.22	1422.63	1531.89	1554.23	1624.41
Atp5k	1835.47	1831.35	1990.74	1884.12	1974.69	2012.15
Bdh1	196.48	152.56	146.57	204.23	181.68	250.12
Bnip3	765.56	632.28	697.1	867.49	808.79	879.57
Btbd1	266.42	252.07	247.43	288.01	289.05	311.15
Bzw2	161	175.15	159.27	202.03	196.91	192.86
Cap2	176.5	180.55	172.85	189.84	210.93	214.81
Cat	223.31	237.43	222.35	230.75	265.85	270.3
Cd24a	51.04	47.74	57.06	85.37	80	83.12
Cd36	593.92	586.69	578.15	635.83	666.94	789.91
Chchd3	505.5	467.89	449.75	522.88	505.27	556.84
Cisd3	101.78	112.63	101.98	115.49	118.5	126.36
Clu	45.59	54.27	38.6	58.42	77.37	75.86
Cox19	112.42	115.48	121.46	148.87	135.4	142.38
Cox7a2	505.34	538.25	533.21	526.51	558.15	551.07
Cox7b	910.55	931.48	978.17	964.7	1043.42	985.04
Cpe	135.9	153.7	136.58	179.46	183.48	206.77
Ctdnep1	187.61	220.01	197.43	205.32	220.69	212.43
Cul3	112.58	108.32	109.43	121.95	130.49	130.05
Cycs	541.12	505.27	503.93	537.32	517.87	567.68
Cyfip2	17.36	19.71	42.3	79.22	41.65	42.02
Dazap2	162.69	204.43	179.93	192.94	200.14	206.05
Ddit4l	26.84	41.07	21.57	32.2	63.9	43.32
Dmpk	318.17	332.23	331.53	389.67	399.03	387.3
Dnaja4	210.57	203.27	195.63	235.73	226.62	242.52
Dusp13	53.86	64.36	56.9	74.77	75.88	65.63
Dusp18	58.96	33.58	30.57	71.32	45.36	67.46
Dusp26	34.37	32.17	36.33	70.64	53.27	48.78
E2f6	154.39	144	130.82	153.74	176.02	192.87
Eif4g2	211.6	228.4	215.48	220.59	231.55	250.3
Entpd4	66.58	102.61	103.82	86.46	75.5	133.21
Esr1	6.6	7.86	5.69	89.62	138.11	128.69
Esrrg	47.77	47.44	41.54	93.31	73.14	99.77
Fam134b	396.85	352.1	319.25	444.66	376.42	397.57
Fam213a	82.81	65.06	69.08	87.15	97.71	94.03
Fam220a	94.49	95.94	77.65	120.6	124.71	129.08
Fermt2	142.28	151.95	146.16	160.11	163.57	165.26
Fkbp3	518.51	556.17	536.5	557.88	643.45	586.96
Fth1	3581.78	3674.52	3562.46	3970.07	3977.59	3935.87
Fxyd6	306.09	297.43	253.54	397.02	347.88	376.6
Fzd9	61.22	64.08	47.19	104.61	79.96	96.4
Gabarap	332.93	363.48	339.56	353.69	365.78	347.66
Gabarapl1	187.45	140.15	106.04	189.44	159.03	173.08
Gapdh	2072.01	1950.17	2015.55	2179.76	2233.59	2226.01
Gng5	526.32	624.33	554.7	583.05	623.11	658.71
Got2	887.85	853.51	841.5	962.18	937.35	1013.13
Grsf1	142.67	133.96	133.97	146.57	157.19	166.6
Gstm1	141.22	151.21	143.43	173.91	189.69	166.67
Gstm5	95.83	95.51	104.95	120.27	116.71	124.71
Gyg	654.79	604.58	613.55	652.45	686.44	674.04
Hba-a1	47.59	23.5	0.01	9.66	296.11	771.75
Hint1	361.76	338.16	379.29	401.62	392.96	367.46
Hrc	700.95	651.68	624.85	715.93	714.05	794.52
Hspa8	1367.82	1356.61	1369.23	1404.3	1745.68	1682.53
Hspb6	3581.59	3510.66	3619.27	4146.72	4102.84	4061.11
Hspb8	304.11	333.44	322.3	350.14	367.17	350.16
Idh2	1504.72	1653.9	1562.26	1598.56	1979.11	1777.74
Idh3a	416.03	410.44	389.37	445	448.26	541.38
Kif1b	145.53	180.47	159.99	182.21	174.73	193.81
Ldb3	1752.67	1825.75	2002.14	1846.47	1879.71	1983.64
Lynx1	198.27	184.41	145.45	213.3	207.03	248.33
Map1lc3a	399.95	359.82	380.32	451.16	468.9	446.17
Mgll	67.35	84.06	66	85.01	66.07	81.91
Mif	173.77	196.15	171.1	210.86	218.54	230.37
Mir2861	0	0	0	17.61	17.36	22.28
Mir8094	0	0	19.76	7.85	8.9	18.78
Morf4l1	267.96	292.85	283.18	299.55	321.67	306.91
Mpc1	859.11	889.15	928.04	922.21	1023.66	971.84
Mrpl30	305.62	322.48	293.98	317.3	302.83	319.59
Mrpl42	544.04	613.19	566.66	647.04	591.41	634.48
Mtch2	141.52	136.06	129.02	154.46	144.07	154.03
Murc	118.4	131.09	116.8	173.18	149.45	152.59
Myot	2023.25	1950.58	2146.12	2255.11	2224.66	2366.6
Naa50	153.98	139.1	124.23	158.62	168.31	185.3
Ndrg4	23.36	29.57	32.82	38.16	73.29	50.48
Ndufa3	959.74	939.42	886.09	972.47	991.22	975.6
Ndufa5	775.49	820.27	750.87	809.66	818.56	801.37
Ndufa6	896.16	899.66	879.54	915.89	933.58	899.82
Ndufb4	739.73	794.13	792.74	820.87	833.92	829.14
Ndufv2	562.94	566.81	588.23	615.74	614.9	638.66
Neb	540.27	463.38	493.38	531.55	551.54	698.56
Nexn	461.85	429.44	463.98	515.93	473.33	534.04
Nnt	417.12	427.67	434.16	471.59	448.62	456.13
Nqo1	21.26	31.84	24.78	32.62	69.59	47.64
Nrap	1505.16	1307.6	1288.09	1497.6	1465.14	1423.95
Nudt4	194.85	199.33	210.58	242.94	222.42	246.97
Optn	91.47	78.48	72.82	98.74	89.93	102.9
Pcp4l1	222.17	211.72	223.64	306.94	331.97	320.03
Pdzrn3	54.74	71.87	53.93	81.22	80.18	90.69
Perm1	155.35	144.3	103.7	179.57	178.36	218.34
Pfn2	175.15	180.79	203.46	193.57	213.25	194.02
Pgk1	561.13	537.43	555.8	617.01	575.13	604.21
Phospho1	134.39	132.61	125.18	179.08	152.24	173.51
Phyh	389.13	352.53	338.02	403.77	459.18	516.64
Pkia	269.56	345.11	306.86	292.6	343.59	341.73
Pla2g16	144.89	138.84	122.95	162.58	162.53	186.63
Plekhb2	65.67	63.7	55.73	71.45	81.23	90.47
Plin5	81.79	53.56	64.96	78.62	72.59	119.01
Ppm1a	182.18	171	165.33	180.32	206.52	201.71
Ppm1b	299.11	286.26	261.94	297.44	366.93	354.76
Ppp1r14b	86.52	117.09	90.86	129.5	112.91	104.74
Ppp1r27	272.79	397.5	196.25	554.48	342	427.2
Ppp2r3a	160.01	168.66	160.32	180.96	173.27	197.52
Pptc7	87.34	97.65	75.92	103.69	96.66	133.37
Prdx3	292.37	291.99	270.48	293	311.85	339.7
Psma1	171.62	172.21	186.12	188.26	191.23	177.57
Psme1	94.61	112.33	100.14	110.4	119.53	139.58
Qk	160.53	173.5	174.19	185.71	161.74	204.83
Rangrf	81.29	84.51	69.71	114.96	104.89	106.87
Rassf3	79.12	89.05	76.29	88.85	101.48	104.63
Rcan1	282.18	163.78	120.56	320.83	205.93	247.6
Reep5	80.73	94.88	91.59	109.12	113.68	121.85
Rilpl1	169.36	145.28	121.26	184.92	186.33	182.61
Rnf11	140.68	149.39	125.72	148.58	164.81	160.03
Rnf115	109.65	106.07	118.09	168.72	113.34	132.4
Rps13	756.22	712.55	780.43	740.54	824.38	763.52
Rragd	63.54	60.2	55.97	76.12	76.05	85.33
Rwdd1	201.7	206.14	194.78	218.04	224.98	216.6
S100a1	569.19	489.43	497.26	759.53	728.24	728.38
Sdr39u1	123.43	122.59	110.48	125.12	140.52	149.78
Sepw1	1371.11	1374.04	1283.37	1412.39	1483.5	1344.99
Skp1a	323.79	323.02	342.31	324.07	386.57	346.97
Slc6a8	75.21	87.72	68.3	97.72	91.05	99.43
Smyd1	313.04	351.75	369.79	368.65	372.52	394.63
Snx3	141.36	164.01	146.71	154.35	169.13	174.82
Sod1	548.26	535.21	530.46	556	576.29	541.57
Sord	87.02	100	88.47	110.46	107.86	120.67
Srl	597.5	568.03	567.31	625.04	576.17	624.18
Stau2	83.83	75.84	91.68	109.19	108.31	104.09
Sucla2	536.24	521.44	513.9	560.7	611.95	618.91
Tead1	65.91	76.36	70.37	78.49	86.7	95.15
Timm17a	342.05	334.33	323.59	366.01	323.88	350.11
Tmem126a	147.52	133.2	140.32	169.86	155.6	170.72
Tmod1	104.07	92.61	106.81	139.64	108.09	135.91
Tnnc1	6489.1	6619.09	6499.46	7071.47	8785.46	6105.01
Tnnt1	6462.35	5685.51	6269.47	6925.19	7636.19	5854.22
Tpm3	8520.09	7330.48	7872.43	8823.33	10660.6	8210.4
Tpt1	4875.8	5144.89	5338.24	5319.9	5475.75	5462.82
Tspan7	137.45	162.29	140.65	160.41	147.8	159
Ttc9	48.41	47.45	60.66	80.57	66.88	62.29
Ttn	255.43	203.67	207.39	255.88	263.38	328.08
Tuba8	257.82	225.62	197.53	316.69	220.85	280.32
Tubb4b	158.24	164.68	150.58	194.02	135.06	201.05
Ubc	860.36	906.22	863.44	950.09	1046.47	943.34
Ube2d3	256.31	278.71	286.47	292.61	271.72	295.81
Uchl1	120.38	109.64	145.73	173.85	158.45	137.36
Ucp2	74.37	86.62	111.74	75.54	102.89	143.63
Ugp2	691.48	699.18	699.24	807.78	838.8	969.11
Uqcc2	434.63	450.11	426.34	460.67	440.02	466.26
Uqcrb	1694.44	1528.52	1679.2	1721.9	1742.56	1687.73
Uqcrc2	835.87	826.96	847.24	831.07	860.5	922.53
Vegfa	87.18	104.84	82.26	118.99	81.97	105.76
Wipi1	86.35	101.13	87.88	100.5	112.51	110.33
Wnk1	65.31	68.47	63.34	79.94	82.41	91.94
Yipf7	224.73	219.97	236.33	267.8	220.86	257.44
