# Supplementary material for: LSD1 defines the fiber type-selective responsiveness to environmental stress in skeletal muscle
Source: eLife. 2023 Jan 25;12:e84618. doi: 10.7554/eLife.84618 (PMC9876571; doi:10.7554/eLife.84618)
Supplement: Supplementary file 3. [file elife-84618-supp3.xlsx]

## Sheet: Suppl File 3 (primer)
Supplementary File 3. Primers used in this study
Gene Symbol	Gene Name	Forward (5'-3')	Reverse (5'-3')
36B4	ribosomal protein, large, P0	GCGTCCTGGCATTGTCTGT	GCAAATGCAGATGGATCAGCC
Lsd1	lysine (K)-specific demethylase 1A	ATGGATGTCACACTTCTGGA	CAAGACCTGTTACAACCATG
Atrogin1	F-box protein 32	AGTGAGGACCGGCTACTGTG	GATCAAACGCTTGCGAATCT
MuRF1	tripartite motif-containing 63	CCTGCAGAGTGACCAAGGA	GGCGTAGAGGGTGTCAAACT
SMART	F-box protein 21	TCAATAACCTCAAGGCGTTC	GTTTTGCACACAAGCTCCA
Ddit4	DNA damage inducible transcript 4	CCAGAGAAGAGGGCCTTGA	CCATCCAGGTATGAGGAGTCTT
Klf15	Kruppel like factor 15	ACAGGCGAGAAGCCCTTT	CATCTGAGCGGGAAAACCT
Gadd45a	growth arrest and DNA damage inducible alpha	CGTAGACCCCGATAACGTGGTA	CGGATGAGGGTGAAATGGAT
Gabarapl1	GABA type A receptor associated protein like 1	CTTTCCCCTTGTTTACCCTCCAT	CCCAATGTCAACCCCTTC
Hspb7	heat shock protein family, member 7	TGTCACCACCTTCAACAACCAC	TCATGACTGTGCCATCAGCTG
Dusp4	dual specificity phosphatase 4	CATCTGCCTGCTTAAAGGTGG	CTCATTGGTGCTGGGAGGTAC
Ampd3	adenosine monophosphate deaminase 3	ACGCTTGCTGGTCGGTTTAG	TGGCTTCCTTCTGTCCGATG
Runx1	runt related transcription factor 1	ACGATGAAAACTACTCGGCAG	CTGAGGTCGTTGAATCTCGCT
Myh7	myosin, heavy polypeptide 7, cardiac muscle, beta	CTCAAGCTGCTCAGCAATCTATTT	GGAGCGCAAGTTTGTCATAAGT
Myh2	myosin, heavy polypeptide 2, skeletal muscle, adult	GAGCAAAGATGCAGGGAAAG	TAAGGGTTGACGGTGACACA
Myl2	myosin, light polypeptide 2, regulatory, cardiac, slow	TGACCACACAAGCAGAGAGG	CCGTGGGTAATGATGTGGA
Tnnc1	troponin C, cardiac/slow skeletal	CTGCAGGAGATGATTGACGA	CAATGTAGCCATCAGCGTTT
Tnni1	troponin I, skeletal, slow 1	TGAAGCCAAATGCCTCCACAACAC	ACACCTTGTGCTTAGAGCCCAGTA
Sln	Sarcolipin	GCTCCTCTTCAGGAAGTGAAG	TGGCCCCTCAGTATTGGTAGG
Myh1	myosin, heavy polypeptide 1, skeletal muscle, adult	GCATCGAGTGGGAGTTCATT	TGAGCTTCAACCTTGCCTTT
Myh4	myosin, heavy polypeptide 4, skeletal muscle	ACATTATTGGCTGGCTGGAC	ACCCTTCTTCTTGCCACCTT
Myl1	myosin, light polypeptide 1	CCCAGCCAAACCTAAGGAAG	TGCATTCACCTGTTCTGTCAA
Mylpf	myosin light chain, phosphorylatable, fast skeletal muscle	AGGGAGCTCCAACGTCTTCT	GCGTCGAGTTCCTCATTCTT
Tnnc2	troponin C2, fast	AGCGGAGGAGTCCCAGTC	ATCACGGTGCCCAACTCTT
Tnni2	troponin I, skeletal, fast 2	AGCAGCAAGGAGCTGGAAGA	ATGGCGTCGGCAGACATAC
Foxk1	forkhead box K1	ACCCACGAATAGCTTGACTG	GCATTAGCGGCTACTGAGACG
Nfatc1	nuclear factor of activated T cells,cytoplasmic, calcineurin dependent 1	GCCTTTTGCGAGCAGTATCT	CATAGTGAGCCCTGTGGTGA
Pitx1	paired-like homeodomain transcription factor 1	TACGAGGACGTGTACGCT	TGAAGAAGGTAAAGCTCTTGGT
Esrrg	estrogen-related receptor gamma	TGACTTGGCTGACCGAG	CCGAGGATCAGAATCTCC
Esrra	estrogen related receptor, alpha	CCTTCTTCAAGAGGACCATCC	TGGTGATCTCACACTCATTGG
Pgc-1a	peroxisome proliferative activated receptor, gamma, coactivator 1 alpha	AAGTGTGGAACTCTCTGGAACTG	GGGTTATCTTGGTTGGCTTTATG
Dhrs7c	dehydrogenase/reductase (SDR family) member 7C	CCCCTGAGCAAAGAAACTGG	CTTCTCCTTCACCCCACAGG
Smox	spermine oxidase	CAGTTCACAGGGAACCCCAAT	AGGAATAGGAACCCCGGAAGTA
Ankrd1	ankyrin repeat domain 1 (cardiac muscle)	ACAGCGCGTGTCCTTTTGAT	GCCAAGGAAAACTGAGTTCGA
Asb15	ankyrin repeat and SOCS box-containing 15	ATCGTCCGGCTGCTTCTCT	GCAGCCTCAGCATGATCTCA
Ndufa6	NADH:ubiquinone oxidoreductase subunit A6	GTCACAGACCCCAGAGTGGT	TAACATGCACCTTCCCATCA
Cox19	cytochrome c oxidase assembly protein 19	AGCTTCCCGCTGGACCACTTC	CCTTTGCATCCTGCACATTAAATAC
Idh2	isocitrate dehydrogenase 2 (NADP+), mitochondrial	GGAGAAGCCGGTAGTGGAGAT	GGTCTGGTCACGGTTTGGAA
Idh3a	isocitrate dehydrogenase 3 (NAD+) alpha	CGCGTGGGTGTCCAAGGTCTC	TGTGACATTGCGCTCCTCCAA
Ldhb	lactate dehydrogenase B	TCTTCCAACACATCCACCAG	GTCCCGAACAACAAGATCACT
Perm1	PPARGC1 and ESRR induced regulator, muscle 1	GAAAACAGTCTTGCTCGCCAA	CTTGTCACCTGGGTTCGTCT
Vegfa	vascular endothelial growth factor A	GGCAGCTTGAGTTAAACGAAC	TGGTGACATGGTTAATCGGTC
