# Supplementary material for: LSD1 defines the fiber type-selective responsiveness to environmental stress in skeletal muscle
Source: eLife. 2023 Jan 25;12:e84618. doi: 10.7554/eLife.84618 (PMC9876571; doi:10.7554/eLife.84618)
Supplement: Supplementary file 4. [file elife-84618-supp4.xlsx]

## Sheet: Suppl File 4 (ChIP primer)
Supplementary File 4. ChIP primers used in this study
Gene Name	Forward (5'-3')	Reverse (5'-3')
Sln	ATTGGCAGCCAAAGGAGCAG	TCTCAAAGGGACAAGCTCCA
Gadd45a	ACTACCTAGAGCTGGCTCAG	CAAGGCAGAGTTGAGCGGA
Ddit4	CCACACCCCCTTTCTGGAA	AAGTCTTTCCTTGATCCTCCC
